1 Intraspecific population admixture of a top piscivore correlates with anthropogenic  
2 alteration of freshwater ecosystems

3 Erik Eschbach (corresponding author), Department of Biology and Ecology of Fishes, Leibniz-Institute  
4 of Freshwater Ecology and Inland Fisheries, Müggelseedamm 310, 12587 Berlin, Germany – current  
5 adress: Thünen-Institute of Fisheries Ecology, Herwigstr. 31, Bremerhaven, Germany, +49 471 9446  
6 0278, [erik.eschbach@thuenen.de](mailto:erik.eschbach@thuenen.de)

7 Arne Wolfram Nolte, Department of Evolutionary Genetics, Max Planck Institute for Evolutionary  
8 Biology, August-Thienemann-Str. 2, 24306 Plön, Germany – Department of Ecological Genomics,  
9 Institute for Biology and Environmental Sciences, Carl von Ossietzky University, 26111 Oldenburg,  
10 Germany, [arne.nolte@uol.de](mailto:arne.nolte@uol.de)

11 Klaus Kohlmann, Department of Ecophysiology and Aquaculture, Leibniz-Institute of Freshwater  
12 Ecology and Inland Fisheries, Müggelseedamm 310, 12587 Berlin, Germany, [kohlmann@igb-berlin.de](mailto:kohlmann@igb-berlin.de)

13 Josep Alos, Instituto Mediterráneo de Estudios Avanzados, IMEDEA (CSIC-UIB). C/ Miquel Marqués  
14 21, 07190, Esporles, Illes Balears, Spain, [alos@imedea.uib-csic.es](mailto:alos@imedea.uib-csic.es)

15 Sandro Schöning, Department of Biology and Ecology of Fishes, Leibniz-Institute of Freshwater  
16 Ecology and Inland Fisheries, Müggelseedamm 310, 12587 Berlin, Germany,  
17 [sandro.schoening@web.de](mailto:sandro.schoening@web.de)

18 Robert Arlinghaus, Department of Biology and Ecology of Fishes, Leibniz-Institute of Freshwater  
19 Ecology and Inland Fisheries, Müggelseedamm 310, 12587 Berlin, Germany – Chair of Integrative  
20 Fisheries Management, Faculty of Life Sciences, Humboldt-Universität zu Berlin, Invalidenstrasse 42,  
21 10115 Berlin, Germany, [arlinghaus@igb-berlin.de](mailto:arlinghaus@igb-berlin.de)

22 **Abstract**

23 Conservation of local genetic diversity is an important policy objective, but  
24 intraspecific genetic diversity can be transformed by natural ecological processes  
25 associated with anthropogenic changes in ecosystems. Environmental changes and  
26 a strong interconnection of drainage systems impact freshwater biodiversity from  
27 gene to population level. Populations can either become extinct or expand their  
28 range and accompanying secondary contacts can lead to genetic admixture. We  
29 investigated how the genetic population structure and the patterns of genetic  
30 admixture of *Esox lucius* L. (the northern pike) vary with the type of ecosystem and  
31 the integrity of the ecosystem assessed by measures under the European Water  
32 Framework Directive. The pike inhabits river, lake and brackish water ecosystems,  
33 where it is confronted with different ecological disturbances. We analysed 1,384 pike  
34 samples from the North, Baltic and Black Sea drainages and differentiated between  
35 metapopulations from each hydrogeographic region using genotypes from 15  
36 microsatellites and mitochondrial *cyt b* sequences. Individual populations showed  
37 signs of genetic admixture ranging from almost zero to complete replacement by  
38 foreign genotypes. Hierarchical general linear modeling revealed a highly significant  
39 positive association of the degree of genetic admixture with decreasing ecological  
40 status. This may mean that populations in disturbed environments are more prone to  
41 influences by foreign genotypes or, alternatively, increased genetic admixture may  
42 indicate adaptation to rapid environmental changes. Regardless of the underlying  
43 mechanisms, our results suggest that anthropogenic alterations of natural freshwater  
44 ecosystems can influence genetic structures, which may lead to a large-scale  
45 reduction of intraspecific genetic diversity.

46

47 **Key words**

48 admixture - ancestry distribution – ecological modification – *Esox lucius* – stocking –

49 range expansion

50 **Introduction**

51 In the age of the Anthropocene, animal and plant populations have to cope with  
52 landscapes that are used and intensively altered by humans (Christie & Knowles,  
53 2015; Ortego et al., 2015; Sexton et al., 2013), which is discussed as the most  
54 prominent factor leading to loss of genetic diversity and evolutionary potential, and  
55 which in turn can result in the irreversible loss of populations and species (Dulvy et  
56 al., 2003; Laurance & Useche, 2009; Smith & Bernatchez, 2008). However, before  
57 extinction occurs, genetic structure of species and populations is expected to  
58 undergo changes, which may reveal processes and functions that help organisms to  
59 adapt to changing environmental conditions (Arnold, 2016).

60 Studies investigating fish communities and populations demonstrated that aquatic  
61 ecosystems react particularly sensitive to ecological changes (e.g. Whitehead et al.,  
62 2017), like habitat fragmentation, increasing isolation of populations through  
63 migration barriers (Waples et al., 2017), artificial opening of new routes for migration  
64 and intentional translocation of individuals through stocking and introduction (Laikre  
65 et al., 2010). Particularly, stocking as a widespread management practice mediates  
66 direct secondary contacts among populations leading to unpredictable outcomes as a  
67 plethora of studies have shown (Allendorf et al., 2001; Diana et al., 2017; Hansen,  
68 2002; Marie et al., 2012; van Poorten et al., 2011). According to these investigations  
69 stocked fish either disappear without a trace or become established to varying  
70 degrees, which eventually leads to admixture of non-native with native populations or  
71 even complete replacement of native populations. For example, Englbrecht et al.  
72 (2002) showed that some native populations of arctic char (*Salvelinus umbla*) were  
73 not genetically affected despite massive stocking in natural lake systems, while other  
74 natural populations were replaced by stocked char of different origin after severe

75 eutrophication of an alpine lake. Therefore it is possible that environmental  
76 degradation through human-induced eutrophication was responsible for the natural  
77 population losing their buffering potential and rendering it vulnerable to invasion by  
78 non-native genotypes. As another example, Harbicht et al. (2014) identified a number  
79 of physico-chemical (oxygen, pH, temperature), morphometrical (surface area and  
80 depth of lakes) and topographical (elevation) factors that significantly influenced  
81 admixture in brook trout (*Salvelinus fontinalis*) as a result of stocking. Similarly,  
82 numerous studies have shown that hybridization is enhanced at the interspecific level  
83 in ecologically perturbed habitats, e.g. in African cichlids *Cichlidae* (Seehausen et al.,  
84 1997; 2008), sculpins *Cottidae* (Nolte et al., 2005), European whitefish *Coregonus*  
85 *spp.* (Bittner et al., 2010; Vonlanthen et al., 2012), and trout *Oncorhynchus spp.*  
86 (Heath et al., 2010).

87 All of these examples support the idea that the outcome of secondary contact  
88 between different populations or lineages is influenced by local ecological conditions,  
89 but as yet, little is known about their exact nature and how they might affect intra-  
90 and interspecific hybridization. Although integrative measures of ecosystem status  
91 are readily available at national and international scales and can be indicative of the  
92 environmental challenges faced by a range of taxa in the wild, research linking  
93 ecosystem status and genetic structuring of freshwater vertebrates on large  
94 geographical scales is still scarce. In Europe, the Water Framework Directive was  
95 introduced as a comprehensive policy to monitor and improve freshwater ecosystem  
96 quality and its ecological status (European Commission, 2000). Accordingly, rivers  
97 and larger lakes are regularly assessed based on a range of biological indices, from  
98 phytoplankton to fish, to assess their ecological status and inform management  
99 actions. Genetic population structures within species, however, are currently not

100 considered in this context, although it is likely that the ecological status of water  
101 bodies is systematically related to the meta-population structure of individual species.  
102 *Esox lucius* L., the northern pike, may well be affected by contemporary  
103 environmental change as e. g. by the loss of floodplains in rivers and nutrient inputs  
104 in lakes (Craig, 1996, Skov & Nilsson, 2018). To fulfill their life-cycle pike strongly  
105 depend on aquatic macrophytes providing shelter for early developmental stages and  
106 camouflage to hunt for prey during the juvenile stage. After reaching sexual  
107 maturation flood plains are essentially needed as spawning ground (Casselman &  
108 Lewis, 1996; Craig, 1996; Raat, 1988). It is very likely that changes in these  
109 ecological key-features affect infra- and intraspecific outcomes upon secondary  
110 contacts caused by stocking (Cowx, 1994; Guillerault et al., 2018; Hühn et al., 2014)  
111 or by active migration through canals connecting once separated water bodies  
112 (Pauwels et al., 2013). For example, Gandolfi et al. (2017) studying the invasion  
113 process of *Esox lucius* into closely related native Italian *Esox flaviae/cisalpinus*  
114 (Lucentini et al., 2011; Bianco & Delmastro, 2011) populations, observed a mosaic-  
115 type distribution of the two species and different degrees of genetic admixture,  
116 possibly as a result of the different ecological status of the studied water bodies:  
117 Lake Garda, which provides good ecological conditions for native  
118 *E. flaviae/cisalpinus* to fulfill its natural life cycle, still seems to out-compete the  
119 establishment of northern pike, while other Italian waters with a less good ecological  
120 status were strongly prone to genetic introgression. Recently in Danish pike  
121 populations at least two regional clusters were identified referring to the  
122 hydrogeographic regions of the Baltic and the North Sea, which could be further sub-  
123 divided at different river catchment scales. At the same time also deviations from  
124 native signatures were observed on local scales, prompting the authors to speculate

125 human-assisted ecological changes affecting habitat quality as possible reasons  
126 besides historical geological alterations (Bekkevold et al. 2015; Wennerström et al.,  
127 2018).

128 The objective of the present study was to explore whether the ecological status of the  
129 inland waterbodies in Germany has possibly influenced the genetic structure of  
130 contemporary pike populations, particularly with respect to genetic admixture among  
131 populations of *E. lucius*. Therefore we extended the approach by Bekkevold et al.  
132 (2015) to a larger geographical scale across all principal drainage systems in  
133 Germany. More specifically, we evaluated the presence of population structure that  
134 permitted genetic assignment of individuals to their origins and used this information  
135 to identify large-scale and local signs for intra-specific admixture. Finally we tested  
136 whether the observed genetic patterns correlated with the ecological status of the  
137 water bodies assessed according to the European Water Framework Directive.

138

## 139 **Material & Methods**

### 140 *Sampling and DNA extraction*

141 Sampling was performed in 2011 and 2012 applying a sampling scheme that covers  
142 as many relevant water systems and types as possible over a wide geographical  
143 area in Germany, accepting that not all sampling points could be sampled with the  
144 same intensity. Nevertheless, we have established standards, i.e. a minimum of 10  
145 individuals characterized by at least 14 microsatellites. The sample collection  
146 comprised specimens from five river catchments draining into the North Sea, six  
147 catchments draining into the Baltic Sea, and one catchment draining into the Black  
148 Sea (Table 1). Three ecosystem types were covered including 26 lakes, 24 rivers

149 and three brackish coastal water areas (Table 1). Pike were sampled from water  
150 bodies covering the complete range of ecological states, from very good (status 1) to  
151 poor (status 5), as defined by the European Water Framework Directive (WFD,  
152 2000/60/EC): two samples from status 1, seven from status 2, 22 from status 3, 10  
153 from status 4 and nine samples from status 5 water bodies. 37 waters were classified  
154 as natural and 13 were classified as heavily modified (see DRYAD deposited  
155 material for details). For three small water bodies (Alte Würm, Kleiner Döllensee, and  
156 Schulzensee) no data according to the Water Framework Directive were available  
157 because they are only generated for standing water bodies beyond 50 ha in size.

158 Fin and muscle tissue samples of pike were collected by commercial and recreational  
159 fishers, research organizations and state fishery authorities. Samples obtained as  
160 frozen tissues were thawed in absolute ethanol (Thomas Geyer, Renningen,  
161 Germany) at room temperature and subsequently transferred to fresh ethanol  
162 following Eschbach (2012). Samples from research organizations were generally  
163 obtained preserved in ethanol, while samples from anglers were obtained air-dried.  
164 DNA of all types of samples was extracted with the nexttec<sup>TM</sup> DNA isolation kit  
165 (Biozym Scientific GmbH, Hess. Oldendorf, Germany) according to the  
166 manufacturer's instruction.

167

### 168 *Genetic marker analysis*

169 We employed nuclear as well as mitochondrial markers to infer population structure  
170 and to compare our data with published data. Fifteen polymorphic microsatellites  
171 (Table 2) for pike were selected according to Eschbach & Schöning (2013). These  
172 were employed to analyze a subset of 1,384 samples of 53 populations with an



173 average sample size of  $22.1 \pm 9.8$  (mean  $\pm$  SD) individuals per population, and  
174  $96.4 \pm 94.0$  (mean  $\pm$  SD) individuals per river catchment. Microsatellites were co-  
175 amplified in multiplex PCR (Table 2) with a Thermocycler T Gradient machine  
176 (Biometra, Goettingen, Germany) using the Qiagen® Multiplex PCR Kit (Qiagen,  
177 Hilden, Germany). Forward primers were 5'-labeled with fluorescent dyes HEX, NED  
178 or FAM (SMB Services in Molecular Biology GmbH, Berlin, Germany) (Table 2). PCR  
179 started with 15 min at 95°C, followed by 35 cycles of 0.5 min at 94°C, 1.5 min at  
180 58°C, 1.5 min at 72°C, and finishing with 10 min at 72°C. Fragments were sized with  
181 an Applied Biosystems 3500xL Sequencer equipped with a 24-capillary array.  
182 Chromatograms were evaluated with GeneMapper® Software v4.1 (Life  
183 Technologies, Darmstadt, Germany).

184 Haplotype analysis of the mitochondrial cytochrome b gene (*cyt b*) was carried out to  
185 link the present data set with the broad scale phylogeographic analysis by Skog et al.  
186 (2014) using the primers described by Grande *et al.* (2004). DNA was extracted with  
187 the ArchivePure DNA Cell/Tissue Kit (5 Prime GmbH, Hilden, Germany). The  
188 Multiplex PCR Kit (Qiagen GmbH, Hilden, Germany) was used for PCR and  
189 sequencing was performed with the BigDye Terminator v.3.1. Cycle sequencing Kit  
190 by Applied Biosystems™, following the instructions of the manufacturers. Sequencing  
191 was carried out on an Applied Biosystems 3100x Genetic Analyzer. A 1.2 kbp region  
192 was amplified for a subset of 184 pike individuals belonging to 22 populations of 12  
193 river catchments. The average sample size was  $9.1 \pm 2.1$  (mean  $\pm$  SD) individuals  
194 per population and  $16.7 \pm 8.5$  (mean  $\pm$  SD) per river catchment. Individual forward  
195 and reverse sequences were assembled using Seqman (DNA star package) and the  
196 resulting contigs were checked by eye to correct sequencing errors. Sequences of  
197 all main and sub haplotypes were deposited at the NCBI database (Acc. no.

198 KY399416 – KY399442).

199

200 *Genetic data analysis*

201 Microsatellite data were tested for the presence of null alleles with MICROCHECKER  
202 2.2.3 (van Oosterhout et al., 2004) using 1,000 randomizations and applying a 95%  
203 confidence interval. Total and mean numbers of alleles as well as heterozygosity ( $H_o$   
204 and Nei's  $H_s$ ) were calculated with FSTAT 2.9.3.2 (Goudet, 1995). GENEPOP 4.2  
205 (Raymond & Rousset, 1995) was applied to test for Hardy-Weinberg deviations and  
206 linkage disequilibrium setting the Markov chain parameters (MCMC) to 10,000  
207 dememorizations, 20 batches and 5,000 iterations per batch.

208 STRUCTURE 2.3.2 (Falush et al., 2003) was used to infer the most likely population  
209 structure based on microsatellite data of 53 pike populations. The calculation was  
210 done with an admixture model without *a priori* population information, using a burn-in  
211 period of 100,000 repeats, 100,000 subsequent MCMC repeats and 10 iterations for  
212 each k value between one and 30. The most likely number of ancestral populations  
213 was identified as the k value, where the change of likelihood dropped considerably  
214 compared to subsequent values ( $\Delta k$  criterion). All individuals were assigned to each  
215 of the ancestral gene pools as defined in the most likely STRUCTURE model. NA  
216 describes the fraction of the genome inherited from the drainage basin-specific  
217 lineage, as opposed to ancestry that most likely originated from a different river basin  
218 according to the STRUCTURE model. To express all foreign genetic influences  
219 (irrespective of their origins) in relation to NA, hybrid indices (HI) for each individual  
220 were inferred from the individual NA values. Using the formula  $HI = 1 - (2 \times |0.5 -$   
221  $NA|)$  results in a value of 1.0, if the native and foreign ancestries contributed equally

222 to an individual's genetic composition (maximal hybrid status, as found in a first  
223 generation hybrid), and a value of 0, if only the native ancestry contributed to an  
224 individual's genetic composition.

225 MSA 4.05 (Dieringer & Schlötterer, 2003) was employed to calculate genetic  
226 differences (Nei's  $D_A$  (Nei, 1983), chord distances (Cavalli-Sforza & Edwards, 1967)  
227 and the proportion of proportiond alleles (Bowcock et al., 1994) among all  
228 populations. To allow for bootstrapping, the permutation option was set to 10,000.  
229 Consensus trees were calculated subsequently with the NEIGHBOR and  
230 CONSENSUS packages of PHYLIP 3.695 (Felsenstein, 1981) and displayed with the  
231 software MEGA 5 (Tamura *et al.*, 2011).

232 Principal coordinate analysis as an alternative to identify genetic clusters was  
233 performed with GeneAIEx 6.5 (Peakall & Smouse, 2012) using the covariance matrix  
234 obtained from  $F_{st}$  values (Table S2).

235 CLUSTAL X Version 2 (Larkin et al., 2007) was used to align all *cyt b* sequences  
236 along with 24 reference sequences of haplotypes described by Skog et al. (2014).  
237 The alignment was trimmed to a length of 1,174 bp that contained the sites that were  
238 diagnostic for the groups of haplotypes described by Skog et al. (2014). This  
239 alignment was used to confirm the presence or absence of the respective haplotypes  
240 in the populations studied here. The relationship among all haplotypes were  
241 visualized using a median-joining network as described by Bandelt et al. (1999) that  
242 was constructed using the program NETWORK 4.6.1.3 (Fluxus Technology Ltd,  
243 Suffolk, UK).

244

245 *Environmental effects on genetic structure*

246 585 pike individuals from 24 lakes and 392 pike individuals from 23 rivers were  
247 tested in two independent hierarchical general linear models (HGLM) to infer the  
248 effect of different ecological predictors on native ancestry (NA) and hybridization  
249 index (HI). These response variables ( $y$ ) were composed of values within the  
250 standard unit interval  $y_i \in [1,0]$ , where  $i$  designated an individual fish. Special  
251 techniques were required for linear modelling with respect to binomial errors and beta  
252 distributed random effects to incorporate features such as heteroskedasticity or  
253 skewness commonly observed in this type of data (Cribari-Netom & Zeileis, 2010).  
254 The data comprised repeated measures within individual water bodies ( $n$  individuals  
255 from 50 different water bodies), and therefore we considered the variance attributed  
256 to water bodies as a random effect. In addition, to account for a higher probability of  
257 natural exchange among individuals sampled in specific waterbodies within a basin,  
258 water bodies were nested within catchments. We then modelled HI and NA on a set  
259 of predictors using a linear predictor with unknown coefficients and a link function  
260 (logit). The predictors considered were: the type of water body (lake or river), its level  
261 of modification (not modified or highly modified) and its ecological status as a  
262 numerical covariate from 1 (very good) to 5 (poor) according to the European Water  
263 Framework Directive. The raw data were retrieved from the Federal Institute of  
264 Hydrology (BfG, Koblenz, Germany: [http://geoportal.bafg.de/mapapps/resources/](http://geoportal.bafg.de/mapapps/resources/apps/had)  
265 [apps/had](http://geoportal.bafg.de/mapapps/had) and [http://geoportal.bafg.de/ mapnavigator](http://geoportal.bafg.de/mapnavigator)) and were deposited in DRYAD.  
266 We used the glmmADMB of the R-package, built on the open source AD Model  
267 Builder nonlinear fitting engine, to fit two HGLM models (one for NA and another one  
268 for HI) considering a beta response distribution type using the logit-link function  
269 (Fournier et al., 2012). The estimates of the fixed effects (in logit scale) as well as  
270 their standard error were estimated via the Laplace approximation. In the initial

271 HGLMs, we included all two-level interactions among the predictors. Non-significant  
272 interactions were sequentially removed from the minimal adequate model testing the  
273 main effects.

274

## 275 **Results**

### 276 *Assessment of genetic markers*

277 All of the 15 microsatellite loci proved to be highly polymorphic with a total number of  
278 9 to 37 different alleles over all pike populations and a mean number of 3.5 to 14.5  
279 different alleles per population (Table 2). The potential presence of null alleles was  
280 detected in 1.6% of alleles over all loci and populations (Table S1). Diversity  
281 measures for observed ( $H_o$ ) and Nei's ( $H_s$ ) heterozygosity ranged from 0.43 to 0.86  
282 and 0.46 to 0.92, respectively, over all populations (Table 2). Populations showed  
283 deviation from Hardy-Weinberg equilibrium in  $2.7 \pm 1.9$  loci (mean  $\pm$  SD) reflected in  
284 significant heterozygote deficiencies in  $2.7 \pm 1.6$  loci (Fig. S1). Linkage disequilibrium  
285 was detected in 3.3% of all possible loci combinations after Bonferroni correction  
286 (Fig. S2). Because departures were distributed over many loci and populations, all  
287 loci were used for population genetic analysis.

288 For network analysis, a 1,174 bp region of the mitochondrial *cyt b* gene containing 48  
289 variable positions was selected. With a total of 918 informative sites in 208  
290 sequences analyzed (excluding sites with gaps and missing data; including reference  
291 sequences), the overall information content was relatively low (3.8%) as expected for  
292 pike.

293

### 294 *Genetic structure of pike populations in Germany*

295 Analysis of microsatellite data with STRUCTURE suggested a k value of either three  
296 or five as the most likely number of existing genetic clusters of pike (Fig. 1, showing  
297 the relevant k range only). However, five clusters were considered less likely based  
298 on the definition of the minimal  $\Delta k$  criterion. To further confirm the results obtained  
299 with STRUCTURE, we considered two additional genetic analyses based on  
300 microsatellite data. First, calculating genetic differences resulted in dendrograms  
301 (trees) with three main clusters. Although bootstrap values were mostly low (and  
302 therefore omitted from fig. 2), the overall topology of the consensus trees proved to  
303 be stable. Using Nei's  $D_A$  yielded exactly the genetic structure of pike populations  
304 predicted by the assignments of STRUCTURE assuming three as the most likely  
305 number of k (Fig. 2). Moreover, the tree analysis showed that the severely admixed  
306 pike populations were grouped into the expected "new" genetic background, e.g. the  
307 Rhine population (RHE2) in the Baltic Sea hydrogeographic group or pike of Großer  
308 Plöner See (GPS) in the Black Sea hydrogeographic group (Fig. 2). Trees based on  
309 the two other distance measures - chord distances and proportion of shared alleles -  
310 yielded the same basic structure of trees, but showed one and three deviation/s  
311 compared to the predictions of STRUCTURE, respectively (trees not shown).  
312 Second, principal coordinate analysis (PCoA) based on  $F_{st}$  values was employed  
313 (Fig. 3). Although variation was moderate (accumulated variance explained by axes 1  
314 and 3 = 23.2% and 22.6% by axes 1 and 2) a clear clustering into three groups  
315 representing the drainage basins of the North, Baltic and Black Sea, respectively  
316 (Table 3), was obtained, which supported a k value of three predicted by the  
317 STRUCTURE analysis. Using the PCoA, severely admixed populations were as well  
318 positioned in the genetic background predicted by the STRUCTURE analysis,  
319 providing further evidence for k = 3.

320 Network analysis with mitochondrial *cyt b* sequences identified two of the three main  
321 haplotypes postulated by Skog et al. (2014). However, while mitochondrial  
322 haplotypes frequencies differed among drainage basins, there was not one to one  
323 correspondence of haplotypes with the main clusters identified here based on  
324 nuclear data. Of 184 sequences 159 (86.4%) grouped with five reference sequences  
325 defined as haplotype E, representing the northern clade of *E. lucius* (Fig. S3). 24  
326 sequences (13.0%) grouped together with 16 haplotype B reference sequences,  
327 constituting the circumpolar clade, and one sequence grouped with three haplotype F  
328 reference sequences of the southern clade. The northern clade exhibited a star-like  
329 appearance consisting of the main haplotype, surrounded by 26 sub-haplotypes,  
330 deviating by one (N = 22) or two mutations (N = 4). Pike individuals from the North  
331 Sea hydrogeographic region were the dominant fraction (59.9%), while individuals  
332 from the Baltic and Black Sea regions contributed 30.2% and 10.7%, respectively.  
333 The circumpolar clade consisted mostly of pike from the Baltic Sea hydrogeographic  
334 region (87.5%) and only of a minority of pike from other regions (North Sea: 4.2%,  
335 Black Sea: 8.3%). It was separated from all but one (B14) haplotype B reference  
336 sequences by one mutation and appeared homogenous, except for two sub-  
337 haplotypes deviating by one mutation. The two clades (the main haplotypes E and B)  
338 differed by six mutations and were connected via a hypothetical ancestor. The  
339 closest representative of the southern clade, connected via the same ancestor,  
340 differed by four mutations from the northern and by six mutations from the  
341 circumpolar clade (Fig. S3).

342

343 *Population structure among the major hydrogeographic basins*

344 Admixture analysis based on microsatellites, revealed varying proportions of the  
345 different genetic lineages in pike populations across hydrogeographic regions. The  
346 Black Sea genetic cluster was most frequent in pike of the Danube and its tributary  
347 rivers (65.3% in pie chart 1 of Fig. 4 – subsequently indicated as e.g. “65.3% in 1”) as  
348 well as in pike of the big alpine lakes (77.5% in 1.1 and 91.5% in 1.2) (Table 3).  
349 Elevated levels of the Black Sea lineage, however, were also found in the  
350 geographically close Lake Constance (86.4% in 4.2) and the river Main (63.7% in  
351 4.1), a big tributary of the river Rhine connected via a channel – the Rhein-Main-  
352 Donau-Kanal – with the Danube. Interestingly, some water bodies in the very north of  
353 Germany hosted a high proportion of Black Sea genetic imprint as well, such as pike  
354 from the river Eider (50.1% in 7) and pike inhabiting Wittensee (58.8% in 2.2) and  
355 Großer Plöner See (67.1% in 10).

356 The Baltic genetic cluster was most prevalent in pike populations of the coastal  
357 waters of the Baltic Sea and water bodies draining into that basin, albeit with  
358 considerable variation (49.4% to 89.7% in 3.1, 3.2, 8, 8.1, 9, 11 and 12). Among the  
359 populations from Baltic tributaries, pike from the Oder main stream and from its  
360 tributary river Neiße, showed signs of pronounced admixture with the Black Sea and  
361 North Sea genetic lineages (in total 57.2% in 3).

362 The North Sea genetic cluster was dominant in populations of the river catchments of  
363 Elbe (78.7% in 2 and 76.5% in 2.1, excluding Wittensee with only 31.7% in 2.2), Ems  
364 (74.8% in 6) and Weser draining into the North Sea. Populations of the Weser  
365 catchment were represented by pike of two big lakes, Steinhuder Meer and Edersee  
366 (a reservoir), which differed in their admixture patterns. While populations of the  
367 Steinhuder Meer were predominantly shaped by the North Sea genetic cluster  
368 (84.3% in 5.1), this ancestry contributed relatively little to pike of the Edersee



369 population (34.5% in 5). Similarly, and unexpectedly, the river Rhine exhibited a  
370 higher proportion of the Baltic than of the North Sea genetic cluster (63.6% in 4).

371 Genetic admixture could also be read from the distance based consensus tree  
372 (Fig. 2) and the frequency based principal coordinate analysis (Fig. 3). E. g., the  
373 Rhine population (RHE2) appeared within the Baltic Sea cluster and pike from  
374 Großer Plöner See (GPS) were placed within the Black Sea cluster.

375

#### 376 *Admixture at the individual level*

377 Genetic admixture was examined at the level of individuals within pike populations to  
378 assess the homogeneity of ancestries and investigate for possible signs of population  
379 substructure (Fig. 5). Based on ancestry coefficients (NA), the distributions of native  
380 vs. foreign genetic ancestries displayed a range from mostly pure native populations  
381 (green violin plots in Fig. 5 with mean NA  $\geq 0.50$ ) to hybrid swarms, with mostly  
382 admixed individuals (yellow violin plots in Fig. 5 with  $0.25 < \text{NA} < 0.50$ ). Moreover,  
383 some distributions were skewed towards foreign ancestry, with complete  
384 replacement of native ancestry in some populations (red violin plots in Fig. 5 with  
385 mean NA  $\leq 0.25$ ). The frequency distribution of ancestry coefficients in some  
386 populations showed signs of bimodality, that is, individuals may fall into different  
387 groups that differ in their ancestry coefficients (Fig. 5). This includes river populations  
388 of e.g. the Danube (DON, INN, NAB, ROT; see table 1 for explanation of IDs) and  
389 Oder catchments (ODE2, ODE7, NEI2) as well as lake populations of e.g. the Trave  
390 (GRA) and Elbe catchments (GKB). In other populations, such patterns were  
391 observed to a less extent, e.g. in lake populations of the Ucker (HAH) and Weser  
392 catchments (STM) and river populations of the Elbe catchment (HAV1, KAR).

393 Ancestry distributions within pike populations of the Black Sea hydrogeographic  
394 region generally exhibited higher proportions of native ancestries (particularly in pike  
395 of the alpine lakes), whereas the two other hydrogeographic regions were comprised  
396 of populations in which individual genotypes suggested high proportions of foreign  
397 genetic material. The most extreme examples included pike of Großer Plöner See  
398 (GPS) and of the rivers Neiße (NEI2) and Main (MAI), where a near complete  
399 replacement of native by foreign genetic identities was suggested by the most likely  
400 STRUCTURE model (Fig. 5) and confirmed by genetic distance trees (Fig. 2) and  
401 principal coordinate analysis (Fig. 3). Pike populations in Lake Constance, however,  
402 ought to be viewed differently in this regard due to their geological history (see  
403 discussion for further details). In the Baltic Sea hydrogeographic region, a coastal  
404 population (BAL2 in Fig. 5) and one freshwater population (WBS) exhibited  
405 pronounced native genetic signatures. Likewise, the North Sea hydrogeographic  
406 region harbored populations that appear to be rather typical and pure representatives  
407 of the respective genetic cluster (JAG, KRK, GST, MUR).

408

#### 409 *Correlation of hybridization levels with ecological quality*

410 Employing hierarchical general linear models revealed that the ecological status of  
411 the water body as well as the type of ecosystem had a significant effect on the  
412 hybridisation index (HI) of pike populations. Specifically, the decline in the ecological  
413 status was highly significantly correlated with HI (Table 4). Each unit of decrease of  
414 the ecological status lead to an increase of HI by a factor (slope) of 0.25 (1.28 in raw  
415 scale)  $\pm$  0.08 with respect to the intercept (defined as the best ecological status).  
416 Accordingly, the HI increased by a value of 0.21 from the best (= 1 in Fig. 6) to the  
417 poorest (= 5) ecological status defined according to the European Water Framework

418 Directive. The estimate (in logit scale) of HI for lakes was -1.79 (0.17 in raw scale)  $\pm$   
419 0.26, while it was -1.37 (0.26 in raw scale)  $\pm$  0.26 in rivers. These values indicated a  
420 significantly stronger signal of past hybridization of pike populations in rivers as  
421 compared to lakes (Table 4). While the hypothesis of a correlation between HI and  
422 the type and ecological status of the water body was supported, relationships of HI  
423 and the general level of modification of the water body (Table 4) and all two-level  
424 interaction effects were not supported (data not shown).

425 In addition, the native ancestry (NA) exhibited a strong negative correlation with the  
426 deterioration of the ecological status of the water bodies (Fig. 6), however this was  
427 not statistically significant (Table 4). This held also true for the predictors “type” (i.e.  
428 ecosystem type) and “modification” (i.e. general degree of modification) of the water  
429 bodies (Table 4), as well as their two-level interactions (not shown), which were  
430 therefore removed from the model with NA.

431

## 432 **Discussion**

### 433 *Differentiation of pike from different drainages*

434 Mitochondrial DNA markers have been previously used to reconstruct the  
435 colonization patterns of pike in Europe after the last glaciations c. 15.000 years ago  
436 (Nicod et al., 2004; Skog et al., 2014). Our own analysis of mitochondrial *cyt b*  
437 sequences together with 15 polymorphic microsatellites (Eschbach & Schöning,  
438 2013) allowed distinguishing lineages that seem typical for different drainage basins.  
439 STRUCTURE analysis (Falush et al., 2003) of microsatellite data revealed a k value  
440 of three as the most likely number of genetic lineages present in Germany (Fig. 1). A  
441 second k value of five was deemed much less likely when judged against results

442 obtained with two other analysis performed with microsatellite data. Both the  
443 construction of genetic distance based consensus trees as well as a principal  
444 coordinate analysis based on allele frequencies argued in favor of only three genetic  
445 clusters. Each of them was regarded as representative of the hydrogeographic  
446 regions in the North Sea, Baltic Sea or Black Sea, suggesting that these were the  
447 most likely distribution areas of the ancestors after the retreat of the glaciers  
448 (Table 3). NETWORK analysis (Bandelt et al., 1999) of *cyt b* haplotypes assigned  
449 about 90% of pike originating from the hydrogeographic region of the Baltic Sea to  
450 the circumpolar clade and almost 60% of pike originating from the North Sea region  
451 to the northern clade as described by Skog et al. (2014). In our data the southern  
452 clade, identified as a third mitochondrial haplotype by Skog et al. (2014), was  
453 represented by only a single individual among 21 pike from the Danube catchment  
454 (Fig. S3). Thus, although our analysis of mitochondrial haplotypes agrees with the  
455 general findings from Skog et al. (2014), our data showed that lineage sorting of  
456 mitochondrial haplotypes has not proceeded to a point where haplotypes alone are  
457 sufficient to distinguish the lineages of pike studied here. Hence, the strongest  
458 support for the existence of three evolutionarily significant units (Moritz, 1994) of pike  
459 with different distribution areas was supported by multilocus microsatellite analyses.

460

#### 461 *Signatures of migration or stocking?*

462 Recent secondary contacts and genetic admixture between divergent pike lineages  
463 have most likely increased as a result of anthropogenic activities. This included  
464 natural migration through human-made artificial connections among different river  
465 basins as well as stocking of economically important fish species. The latter  
466 represents an important factor that increases the potential for gene flow between

467 populations naturally separated in space. Unfortunately, past stocking is generally  
468 not well documented in Germany (Arlinghaus et al., 2015), but certainly has occurred  
469 over decades in central Europe in pike and multiple other economically relevant  
470 fishes (Cowx, 1994; Guillerault et al., 2018; Kottelat & Freyhof, 2007; Larsen & Berg,  
471 2004). Given the poor locality-specific records, it is however impossible to take  
472 stocking into account in a more detailed way than just to accept that it has happened  
473 frequently across pike stocks (Arlinghaus et al., 2015). Nevertheless, the pike system  
474 offers the opportunity to explore environmental factors that stabilize existing diversity  
475 patterns or, conversely, promote admixture, without knowing which factor of  
476 secondary contact was ultimately responsible. Pike of the Danube catchment and of  
477 the brackish coastal areas of the Baltic Sea exhibited a clear dominance of native  
478 ancestry as inferred from analysis of 15 polymorphic microsatellites (Fig. 4).  
479 Likewise, relatively low admixture levels were observed in pike populations of the  
480 Ems (pie-chart no. 6 in Fig. 4) and Weser catchments (pie-chart no. 5.1 in Fig. 4)  
481 belonging to the North Sea hydrogeographic region. A possible explanation for the  
482 persistence of autochthonous populations is either a low level of local stocking or  
483 competitive exclusion of foreign genotypes by better-adapted native populations  
484 (Engbrecht et al., 2002; Eschbach et al., 2014; Gandolfi et al., 2017). It has been  
485 found before that brackish water populations are adapted to reproduction in low  
486 salinity conditions, causing an increase in the mortality of stocked freshwater fish,  
487 thereby preventing introgression despite decades of stocking (Jørgensen et al., 2010;  
488 Larsen et al., 2005). Moreover, high density blocking can effectively counteract  
489 establishment of immigrants from a distant population in an environment already  
490 inhabited by locally adapted conspecifics as long as the local stock is naturally  
491 reproducing at high levels (van Poorten et al., 2011; Waters, 2011). In line with this,

492 stocking experiments with pike showed that stocked individuals suffer from  
493 substantially higher mortality than wild conspecifics, if the natural reproduction is  
494 sufficient, reducing the potential for successful establishment (Arlinghaus et al., 2015;  
495 Diana et al., 2017; Hühn et al., 2014).

496 In some water bodies investigated in this study, however, pike individuals showed  
497 high foreign ancestries, e.g. in the rivers Neiße, Main, Rhine and Eider, as well as in  
498 the lakes Wittensee and Edersee. This data suggested that much of the genetic  
499 material from native populations may be replaced through the introduction of foreign  
500 stocks, which in turn can maintain populations that are resilient to further invasion by  
501 local genotypes. In this context, our analysis suggests a near complete replacement  
502 of native pike in the lake Großer Plöner See, in the north of Germany that is presently  
503 inhabited by pike characterized by microsatellite genotypes that are likely to originate  
504 from the Danube catchment. Admittedly, the data set we used in this study is  
505 heterogeneous and complex, which makes an analysis of the overall population  
506 structure a difficult task. Still, sampling for this particular lake is above average  
507 ( $N = 30$  individuals), and the effect we observed according to the most likely  
508 STRUCTURE model was unambiguous and supported by two other analytical  
509 methods (genetic distance based consensus trees and allele frequency based  
510 PCoA). Englbrecht et al. (2002) described a comparable case for the arctic char  
511 (*Salvelinus umbla*) in Starnberger See (Bavaria, Germany), where resident fish have  
512 been completely replaced by stocked fish. They argue that this was possible because  
513 the lake became heavily eutrophied in the middle of the last century (Ruecker et al.,  
514 1999), with resident char approaching near extinction, while non-resident char were  
515 apparently adapted to deal with the novel environment. There is clear evidence that  
516 such a complete replacement has occurred in a range of other stock-enhanced

517 populations of fishes (van Poorten et al., 2011). Thus, although no detailed ecological  
518 data was available for Großer Plöner See, it is possible that its native population  
519 might have undergone a similar fate and became invaded by stocked pike. This  
520 example shows that complete genetic swamping most likely by stocking is indeed a  
521 possible scenario even if the ecosystem appears healthy and of high integrity in  
522 present time. By contrast, the high proportion of Black Sea hydrogeographic region  
523 ancestry in pike of Lake Constance is likely a result of ancient natural connections  
524 with the Danube catchment and rather reflects native ancestry stemming from natural  
525 post-glacial dispersal, previously reported for perch (*Perca fluviatilis*) by Behrmann-  
526 Godel et al. (2004) for the same system. The minor proportions of other non-North  
527 Sea hydrogeographic region ancestries were likely due to human-assisted  
528 colonization via introduction and stocking, because southward gene flow from  
529 downstream areas of the river Rhine is not possible due to an insurmountable  
530 waterfall at Schaffhausen (Switzerland).

531 Pike populations in other water bodies exhibited high levels of genetic admixture.  
532 When source populations are adjacent, admixture can be explained by natural  
533 immigration through man-made connections such as the “Main-Donau Kanal” linking  
534 the Danube with the river Main (Powels et al., 2013). However, we also detected  
535 signatures of admixture between rather distant source populations, e.g. between pike  
536 of the rivers Oder in the east and Rhine in the west or between the rivers Danube in  
537 the south and Eider in the very north of Germany. Stocking, rather than migration, is  
538 a more likely explanation here, because migration would probably have created a  
539 more coherent geographical pattern. Our data are in line with genetic structures of  
540 pike populations in Denmark at the intra-specific level (Bekkevold et al., 2015) and  
541 Italy at the inter-specific level (Gandolfi et al., 2017), both of which not always

542 reflected natural catchment barriers and were likely caused by successful pike stock  
543 enhancement activities in the past.

544 Pike of the lakes Großer Kossenblatter See, Drewitzer See and Ammersee exhibited  
545 pronounced linkage disequilibria (Fig. S2), and all pike of lake Ammersee additionally  
546 exhibited deviation from Hardy-Weinberg equilibrium as well as heterozygote  
547 deficiencies (Fig. S1). In agreement with this, bimodal distributions of native and  
548 foreign ancestries of individuals of some populations confirmed that they were not  
549 genetically homogenous. This can be compared to bimodal hybrid zones, which are  
550 often characterized by pronounced deviation from Hardy-Weinberg equilibrium due to  
551 restrictions in panmixia (Allendorf et al., 2001; Redenbach & Taylor, 2003). Possible  
552 scenarios to explain this pattern include that foreign pike genotypes are regularly  
553 introduced at a large scale without much reproductive success. Alternatively, foreign  
554 genotypes may be reproductively isolated to some extent so that they persist as a  
555 distinct genetic population in parallel to the local population of pike. The latter  
556 explanation is less likely because we know that stocked individuals that survive  
557 readily hybridize with native pike (Arlinghaus et al., 2015), although there is evidence  
558 of natal homing of pike in large standing water bodies, which can contribute to the  
559 development of meta-populations within lake ecosystems (Miller et al., 2001).

560

#### 561 *Impacts of ecosystem status on hybridization*

562 In other cases, we detected various degrees of foreign ancestry (Fig. 5),  
563 documenting likely admixture between genetically distinct populations – an effect that  
564 increased with the degradation of the ecological status of the recipient ecosystem.  
565 We note that the quality of this inference depends on the sample sizes that were



566 available for each population as well as the degree of differentiation between the  
567 presumed source populations. It might, therefore, be useful to revisit specific  
568 populations with a more powerful study design and genome wide marker coverage.  
569 Nonetheless, it was obvious that the three pike lineages readily hybridized upon  
570 secondary contact. This result bears general questions on why hybridization  
571 proceeded with different intensity in different pike populations and whether pike of  
572 different origins are indeed isolated to some extent when they are brought into  
573 secondary contact.

574 We found that the individual admixture levels in pike, expressed as a hybridization  
575 index (HI), were not confined to a specific hydrogeographic region or any particular  
576 river catchment therein. Instead it turned out that the HI increased significantly with  
577 decreasing ecological quality of a water body. Albeit not statistically significant, we  
578 observed a congruent decrease of native ancestry. Thus, environmental change  
579 could have driven genetic changes in pike populations and individuals by affecting  
580 the frequency of hybridization among populations brought into secondary contact.  
581 The fact that the HI was only slightly lower in water bodies with low modifications as  
582 compared to the HI of highly modified waters demonstrates that the admixture as  
583 such occurs in all populations and is not restricted to highly modified habitats (Fig. 6).

584 Our analysis yielded a significantly higher HI in pike populations in rivers as  
585 compared to lake-dwelling pike, which is likely due to fundamental ecological  
586 differences between the two habitat types such as the increased natural connectivity  
587 in rivers, resource availability, productivity, habitat structure, and community  
588 composition (Irz et al., 2006; Hof et al., 2008). Most importantly, however, rivers and  
589 lakes vary in stability and disturbance frequency, including exposure to catastrophic  
590 floods, which occur more frequently in lotic than in lentic systems. Rivers of central

591 Europe also have been more strongly modified, e.g. by removal of connectivity to  
592 floodplains and habitat simplification, which represent a central component of their  
593 disturbance regime and at the same time constitute essential spawning habitat for  
594 pike. In a recent meta-analysis comparing resistance of limnic, marine and terrestrial  
595 ecosystems towards invasive species, Alofs & Jackson (2014) clearly demonstrated  
596 that lentic systems displayed a higher biotic resistance than lotic systems, which is in  
597 accordance with our findings of different susceptibilities towards hybridization in river  
598 and lake pike populations.

599 Our observation that hybridization in pike appears to be favored in ecologically  
600 perturbed water bodies raises important questions about the mechanisms. The effect  
601 could first be caused due to an increase of foreign genotypes that managed to invade  
602 a weakened native population (Englbrecht et al., 2002; Gandolfi et al., 2017).  
603 Alternatively, genetically admixed fish could be more competitive in the face of  
604 anthropogenic changes to the ecosystem. This would resemble the first step of a  
605 hybrid speciation scenario, where intraspecific hybrids are expected to be most  
606 successful when parental populations are not at their optimum (Abbott *et al.*, 2013;  
607 Nolte & Tautz, 2010). Stelkens *et al.* (2014) showed that particularly the interactions  
608 of genetic variants between distant *Saccharomyces* strains can lead to a better  
609 survival in environments of decreasing quality. Thus, hybridization can create  
610 biodiversity resulting in novel phenotypes and adaptive change in response to  
611 environmental change (Arnold, 2016; Charlesworth & Willis, 2009; Edmands, 2007;  
612 Sefc et al., 2017). Examples of these processes can be found among invaders  
613 conquering new environments that were not occupied by populations of the  
614 respective species before, as it was found for *Cottus* hybrids in the river Rhine (Nolte  
615 et al., 2005; Stemshorn et al., 2011), but also for spiders (Krehenwinkel & Tautz,

616 2013) and some plants (Keller & Taylor, 2010). Likewise, in a previous study we  
617 observed increased intraspecific genetic diversity of zander (*Sander lucioperca*) in  
618 water bodies, where this fish species had been introduced in the late 19<sup>th</sup> century, a  
619 pattern that would be in line with an advantage of admixed individuals in the course  
620 of an invasion (Eschbach et al., 2014). Thus, new combinations of genes from  
621 different evolutionary backgrounds might enable fast adaptation, and thus increase  
622 the chance to survive under worsening environmental conditions (Arnold 2016).  
623 However, careful future studies are needed to distinguish the adaptive scenario  
624 outlined here from neutral explanations that are related to abrupt changes in  
625 propagule pressure in fluctuating environments.

626

#### 627 *Conclusions and implications*

628 At the species level, large-scale hybridization, which extends over different  
629 hydrogeographic regions each with its own evolutionary history of genetic lines, is  
630 synonymous with genetic erosion (Epifanio & Philipp, 2001), i.e. it increases the fate  
631 of extinction due to the loss of evolutionary potential. Especially in a species such as  
632 pike, which is characterized by a low natural genetic variability compared to other  
633 freshwater fish, it may be important to maintain genetic diversity through different  
634 genetic lines. Our study clearly showed a novel relationship between ecosystem  
635 status, assessed under the European Water Framework Directive, and the genetic  
636 structure of northern pike. It supports the idea that habitat degradation can also have  
637 far-reaching consequences for genetic integrity within species and promotes efforts  
638 to further improve the ecological quality of lakes and rivers. In the case of pike, this  
639 would essentially mean reconnecting floodplains with rivers and reducing nutrient  
640 inputs into lakes, which would increase both population size and genetic biodiversity.

641

642 **Acknowledgements**

643 Particular thanks go to Yvonne Klaar, Asja Vogt, Jasmin Spamer and Elke Bustorf for  
644 technical assistance in the lab, as well as Petra Kersten for invaluable advice on  
645 microsatellite analysis. We are also indebted to Ute Mischke for kindly providing  
646 additional ecological data of the different water bodies. We thank Jochem Kail for  
647 creating the map in Fig. 4. We are very much obliged to the many fishers, anglers,  
648 fisheries authorities and research organisations for providing tissue samples as well  
649 as a lot of helpful information. We are grateful to the whole BESATZFISCH team and  
650 Michael Monaghan and his POPGEN group for many fruitful discussions. Funding of  
651 the current work was granted by the German Federal Ministry of Education and  
652 Research within the project BESATZFISCH ([www.besatz-fisch.de](http://www.besatz-fisch.de)) in the Program for  
653 Social-Ecological Research (Grant No. 01UU0907 to R. A.). A.N. was supported  
654 through an ERC starting grant “EVOLMAPPING”.

655

656 **References**

657 Abbott, R., Albach, D., Ansell, S., Arntzen, J. W., Baird, S. J. E., Bierne, N. ... Zinner,  
658 D. (2013). Hybridization and speciation. *Journal of Evolutionary Biology*, 28, 229-246.

659 Aguilar, A., Banks, J. D., Levine, K. F., & Wayne, R. K. (2005). Population genetics of  
660 northern pike (*Esox lucius*) introduced into Lake Davis, California. *Canadian Journal*  
661 *of Fisheries and Aquatic Sciences*, 62, 1589-1599.

662 Allendorf, F. W., Leary, R. F., Spruell, P., & Wenburg, J. K. (2001). The problems  
663 with hybrids: setting conservation guidelines. *Trends in Ecology & Evolution* 16, 613-  
664 622.

- 665 Alofs, K. M. & Jackson, D. A. (2014). Meta-analysis suggests biotic resistance in  
666 freshwater environments is driven by consumption rather than competition. *Ecology*,  
667 95, 3259-3270.
- 668 Arlinghaus, R., Cyrus, E. - M., Eschbach, E., Fujitani, M., Hühn, D., Johnston, F., et  
669 al. (2015). *Hand in Hand für eine nachhaltige Angelfischerei: Ergebnisse und*  
670 *Empfehlungen aus fünf Jahren praxisorientierter Forschung zu Fischbesatz und*  
671 *seinen Alternativen*. Berichte des IGB, (Hand in hand for a sustainable angling  
672 fishery: Results and recommendations from five years of practice-oriented research  
673 on fish stocking and its alternatives. Reports of the IGB), Berlin, Germany.
- 674 Arnold, M. L. (2016). Anderson's and Stebbins' prophecy comes true: genetic  
675 exchange in fluctuating environments. *Systematic Botany Monographs*, doi:  
676 10.1600/036364416X690679.
- 677 Bandelt, H. - J., Forster, P., & Röhl, A. (1999). Median-joining networks for inferring  
678 intraspecific phylogenies. *Molecular Biology and Evolution*, 16, 37-48.
- 679 Behrmann-Godel, J., Gerlach, G., & Eckmann, R. (2004). Postglacial colonization  
680 shows evidence for sympatric population splitting in Eurasian perch (*Perca fluviatilis*  
681 L.) in Lake Constance. *Molecular Ecology*, 2, 491-497.
- 682 Bekkevold, D., Jacobsen, L., Hemmer-Hansen, J., Berg, S., & Skov, C. (2015). From  
683 regionally predictable to locally complex population structure in a freshwater top  
684 predator: river systems are not always the unit of connectivity in northern pike (*Esox*  
685 *lucius*). *Ecology of Freshwater Fish*, 24, 305-316.
- 686 Bianco, P. G. & Delmastro, G. B. (2011): Recenti novità tassonomiche riguardanti i  
687 pesci d'acqua dolce autoctoni in Italia e descrizione di una nuova specie di luccio  
688 (Recent taxonomic news about freshwater fish native to Italy and description of a

689 new species of pike). *Researches on Wildlife Conservation* (IGF publ.), 2 (suppl.): 1–  
690 13.

691 Bittner, D., Excoffier, L., & Largiadèr, R. (2010). Patterns of morphological changes  
692 and hybridization between sympatric whitefish morphs (*Coregonus spp.*) in a Swiss  
693 lake: A role for eutropication? *Molecular Ecology*, 19, 2152-2585.

694 Bowcock, A. M., Ruíz-Linares, A., Tomfohrde, J., Minch, E., Kidd, J. R., & Cavalli-  
695 Sforza, L. L. (1994). High resolution human evolutionary trees with oligomorphic  
696 microsatellites. *Nature*, 368, 455-457.

697 Casselmann, J. M. & Lewis, C. A. (1996). Habitat requirements of northern pike  
698 (*Esox lucius*). *Canadian Journal of Fisheries and Aquatic Sciences*, 53, 161-174.

699 Cavalli-Sforza, L. L. & Edwards, A. W. F. (1967). Phylogenetic analysis: models and  
700 estimation procedures. *American Journal of Human Genetics*, 19, 233-257.

701 Charlesworth, D., Willis, J. H. (2009). The genetics of inbreeding depression. *Nature*  
702 *Reviews genetics*, 10, 783-796.

703 Christie, M. R. & Knowles, L. L. (2015). Habitat corridors facilitate genetic resilience  
704 irrespective of species dispersal abilities or population sizes. *Evolutionary*  
705 *Applications*, 8: 454-463.

706 Cowx, I. G. (1994). Stocking strategies. *Fisheries Management and Ecology*, 1, 15-  
707 30.

708 Craig, J. (1996). Pike - Biology and exploitation. Fish and Fisheries Series, Springer  
709 Netherlands.

710 Cribari-Netom, F. & Zeileis, A. C. (2010). Beta Regression in R. *Journal of Statistical*  
711 *Software*, 34, 1-24.

- 712 Diana, M. J., Wagner, C. P., & Wahl, D. H. (2017). Differences in stocking success  
713 among geographically distinct stocks of juvenile Muskellunge in Illinois lakes. *North*  
714 *American Journal Of Fisheries Management*, 37, 633-643.
- 715 Dieringer, D. & Schlötterer, C. (2003). Microsatellite analyser (MSA): a platform  
716 independent analysis tool for large microsatellite data sets. *Molecular Ecology Notes*,  
717 3,167-169.
- 718 Dulvy, N. K., Sadovy, Y., & Reynolds, J. D. (2003). Extinction vulnerability in marine  
719 populations. *Fish and Fisheries*, 4, 25-64.
- 720 Edmands, S. (2007). Between a rock and a hard place: evaluating the relative risks  
721 of inbreeding and outbreeding for conservation and management. *Molecular Ecology*,  
722 16, 463-475.
- 723 Englbrecht, C. C., Schlieven, U., & Tautz, D. (2002). The impact of stocking on the  
724 genetic integrity of Arctic charr (*Salvelinus*) populations from the Alpine region.  
725 *Molecular Ecology*, 11, 1017-1027.
- 726 Epifanio, J. & Philipp, D. (2001). Simulating the extinction of parental lineages from  
727 introgressive hybridization: the effects of fitness, initial proportions of parental taxa,  
728 and mate choice. *Reviews in Fish Biology and Fisheries*, 109, 339-354.
- 729 Eschbach, E. (2012). Ascertaining optimal protocols for DNA extraction of different  
730 qualities of pike (*Esox lucius*) tissue samples – a comparison of commonly used solid  
731 phase extraction methods. *Environmental Biotechnology*, 8, 7-14.
- 732 Eschbach, E. & Schöning, S. (2013). Identification of high-resolution microsatellites  
733 without *a priori* knowledge of genotypes using a simple scoring approach. *Methods in*  
734 *Ecology and Evolution*, 4, 1076-1082.

- 735 Eschbach, E., Nolte, A., Kersten, P., Kohlmann, K., Kail, J., & Arlinghaus, R. (2014).  
736 Population differentiation of zander (*Sander lucioperca*) across native and newly  
737 colonized ranges suggests increasing admixture in the course of an invasion.  
738 *Evolutionary Applications*, 7, 555-568.
- 739 European Commission 2000. Directive 2000/60/EC of the European Parliament and  
740 of the Council of 23rd October 2000 establishing a framework for Community action  
741 in the field of water policy. Official Journal of the European Communities, L327/1.  
742 European Commission, Brussels.
- 743 Falush, D., Stephens, M., & Pritchard, J. K. (2003). Inference of population structure  
744 using multilocus genotype data: linked loci and correlated allele frequencies.  
745 *Genetics*, 164, 1567-1587.
- 746 Felsenstein, J. (1981). Evolutionary trees from DNA sequences: a maximum  
747 likelihood approach. *Journal of Molecular Evolution*, 17, 368-376.
- 748 Fournier, D. A., Skaug, H. J., Ancheta, J., Ianelli, J., Magnusson, A., Maunder, M. N.  
749 ... Sobert, J. (2012). AD Model Builder: using automatic differentiation for statistical  
750 inference of highly parameterized complex nonlinear models. *Optimization Methods*  
751 *and Software*, 27, 233-249.
- 752 Gandolfi, A., Ferrari, C., Crestanello, B., Girardi, M., Lucentini, L., & Meraner, A.  
753 (2017). Population genetics of pike, genus *Esox* (*Actinopterygii*, *Esocidae*), in  
754 Northern Italy: evidence for mosaic distribution of native, exotic and introgressed  
755 populations. *Hydrobiologia*, 794, 73-92.
- 756 Goudet, J. (1995). FSTAT (ver. 1.2): a computer program to calculate F-statistics.  
757 *Journal of Heredity*, 86, 485-486.
- 758 Grande, T., Laten, H., & Lopez, J. A. (2004). Phylogenetic relationships of extant



- 759 esocid species (*Teleostei: Salmoniformes*) based on morphological and molecular  
760 characters. *Copeia*, 2004, 743-757.
- 761 Guillerault, N., Hühn, D., Cucherousset, J., Arlinghaus, R. & Skov, C. 2018. Stocking  
762 for pike population enhancement. In: Biology and ecology of pike (C. Skov & P. A.  
763 Nilsson, eds), pp. 215-247. CRC Press, Boca Raton, Florida.
- 764 Guillerault, N., Hühn, D., Cucherousset, J., Arlinghaus, R. & Skov, C. (2018). Biology  
765 and ecology of pike. Boca Raton, FL: CRC Press.
- 766 Hansen, M. M. (2002). Estimating the long-term effects of stocking domesticated  
767 trout into wild brown trout (*Salmo trutta*) populations: an approach using  
768 microsatellite DNA analysis of historical and contemporary samples. *Molecular*  
769 *Ecology*, 11, 1003-1015.
- 770 Harbicht, A. B., Alshamli, M., Wilson, C. C., & Fraser, D. J. (2014). Anthropogenic  
771 and habitat correlates of hybridization between hatchery and wild brook trout.  
772 *Canadian Journal of Fisheries and Aquatic Sciences*, 71, 688-697.
- 773 Heath, D., Bettles, C. M., & Roff, D. (2010). Environmental factors associated with  
774 reproductive barrier breakdown in sympatric trout populations on Vancouver Island.  
775 *Evolutionary Applications*, 3, 77-90.
- 776 Hof, C., Brändle, M., & Brandl, R. (2008). Latitudinal variation of diversity in  
777 European freshwater animals is not concordant across habitat types. *Global Ecology*  
778 *and Biogeography*, 17, 539-546.
- 779 Hühn, D., Lübke, K., Skov, C., & Arlinghaus, R. (2014). Natural recruitment, density-  
780 dependent juvenile survival, and the potential for additive effects of stock  
781 enhancement: an experimental evaluation of stocking northern pike (*Esox lucius*) fry.  
782 *Canadian Journal of Fisheries and Aquatic Sciences*, 71, 1508-1519.

- 783 Irz, P., Odion, M., Arguillier, C., & Pont, D. (2006). Comparison between the fish  
784 communities of lakes, reservoirs and rivers: can natural systems help define the  
785 ecological potential of reservoirs? *Aquatic Sciences*, 68, 109-116.
- 786 Jacobsen, B. H., Hansen, M. M., & Loeschcke, V. (2005). Microsatellite DNA analysis  
787 of northern pike (*Esox lucius* L.) populations: insights into the genetic structure and  
788 demographic history of a genetically depauperate species. *Biological Journal of the*  
789 *Linnean Society*, 84, 91-101.
- 790 Jørgensen, A. T., Hansen, B. W., Vismann, B., Jacobsen, L., Skov, C., Berg, S.,  
791 Bekkevold, D. (2010). High salinity tolerance in eggs and fry of a brackish *Esox*  
792 *lucius* population. *Fisheries Management and Ecology*, 17, 554-560.
- 793 Keller, S. R. & Taylor, D. R. (2010). Genomic admixture increases fitness in an  
794 invasive weed. *Journal of Evolutionary Biology*, 23, 1720-1731.
- 795 Kottelat, M. & Freyhof, J. (2007). Handbook of European freshwater fishes. Berlin,  
796 Germany: Kottelat, Cornol and Freyhof.
- 797 Krehenwinkel, H. & Tautz, D. (2013). Northern range expansion of European  
798 populations of the wasp spider *Argiope bruennichi* is associated with global  
799 warming-correlated genetic admixture and population-specific temperature  
800 adaptations. *Molecular Ecology*, 22, 2232-2248.
- 801 Laikre, L., Schwartz, M. K., Waples, R. S., Ryman, N., & GeM Working Group (2010).  
802 Compromising genetic diversity in the wild: unmonitored large-scale release of plants  
803 and animals. *Trends in Ecology & Evolution*, 25, 520-529.
- 804 Larkin, M. A., Blackshields, G., Brown, N. P., Chenna, R., McGettigan, P.A.,  
805 McWilliam, H., ... Higgins, D. G. (2007). Clustal W and Clustal X version 2.0.  
806 *Bioinformatics*, 23, 2947-2948.

- 807 Larsen, L. K. & Berg, S. (2004). NOBANIS – Invasive alien species fact sheet –  
808 *Stizostedion lucioperca*. <https://www.nobanis.org>.
- 809 Larsen, P. F., Hansen, M. M., Nielsen, E. E., & Loeschke, V. (2005). Stocking impact  
810 and temporal stability of genetic composition in a brackish northern pike (*Esox lucius*  
811 L.), population assessed using microsatellite DNA analysis of historical and  
812 contemporary samples. *Heredity*, 95,136-143.
- 813 Laurance, W. F. & Useche, D. C. (2009). Environmental synergisms and extinctions  
814 of tropical species. *Conservation Biology*, 23, 1427-1437.
- 815 Lucentini, L., Puletti, M. E., Ricciolini, C., Gigliarelli, L., Fontaneto, D., Lanfaloni, L.,  
816 Bilò, F., Natali, M., & Panara, F. (2011): Molecular and Phenotypic Evidence of a  
817 New Species of Genus *Esox* (Esocidae, Esociformes, Actinopterygii): The Southern  
818 Pike, *Esox flaviae*. PLoS ONE, 6, 1–14, doi:10.1371/journal.pone.0025218
- 819 Marie, A. D., Bernatchez, L., & Garant, D. (2012). Environmental factors correlate  
820 with hybridization in stocked brook charr (*Salvelinus fontinalis*). *Canadian Journal of*  
821 *Fisheries and Aquatic Sciences*, 69, 884-893.
- 822 Miller, L. M., Kallemeyn, L., & Senanan, W. (2001). Spawning-site and natal-site  
823 fidelity by northern pike in a large lake: mark–recapture and genetic evidence.  
824 *Transactions of the American Fisheries Society*, 130, 307-316.
- 825 Miller, L. M. & Kapuscinski, A. R. (1996). Microsatellite DNA markers reveal new  
826 levels of genetic variation in northern pike. *Transactions of the American Fisheries*  
827 *Society*, 125, 971-977.
- 828 Miller, L. M. & Kapuscinski, A. R. (1997). Historical analysis of genetic variation  
829 reveals low effective population size in a northern pike (*Esox lucius*) population.  
830 *Genetics*, 147, 1249-1258.

- 831 Miller, L. M. & Senanan, W. (2003). A review of northern pike population genetics  
832 research and its implications for management. *North American Journal Of Fisheries*  
833 *Management*, 23, 297-306.
- 834 Moritz, C. (1994). Defining „Evolutionarily Significant Units“ for conservation. *Trends*  
835 *in Ecology & Evolution*, 9, 373-375.
- 836 Nei, M., Tajima, F., & Tateno, Y. (1983). Accuracy of estimated phylogenetic trees  
837 from molecular data. *Journal of Molecular Evolution*, 19,153-170.
- 838 Nicod, J. - C., Wang, Y. Z., Excoffier, L., & Largiadér, C. R. (2004). Low levels of  
839 mitochondrial DNA variation among central and southern European *Esox lucius*  
840 populations. *Journal of Fish Biology*, 64, 1442-1449.
- 841 Nolte, A. W., Freyhof, J., Stemshorn, K. C., & Tautz, D. (2005). An invasive lineage  
842 of sculpins, *Cottus* sp. (*Pisces, Teleoste*) in the Rhine with new habitat adaptations  
843 has originated from hybridization between old phylogeographic groups. *Proceedings*  
844 *of the Royal Society B: Biological Sciences*, 22, 2379-2387.
- 845 Nolte, A. W. & Tautz, D. (2010). Understanding the onset of hybrid speciation.  
846 *Trends in Genetics*, 26, 54-58.
- 847 Ortego, J., Aguirre, M. P., Noguerales, V., & Cordero, P. J. (2015). Consequences of  
848 extensive habitat fragmentation in landscape-level patterns of genetic diversity and  
849 structure in the Mediterranean esparto grasshopper. *Evolutionary Applications*, 8,  
850 621-632.
- 851 Ouellet-Cauchon, G., Mingelbier, M., Lecomte, F., & Bernatchez, L. (2014).  
852 Landscape variability explains spatial pattern of population structure of northern pike  
853 (*Esox lucius*) in a large fluvial system. *Ecology and Evolution*, 4, 3723-3735.

- 854 Peakall, R. & Smouse, P. E. (2012). GenAEx 6.5: genetic analysis in Excel.  
855 Population genetic software for teaching and research-an update. *Bioinformatics*, 28,  
856 2537-2539.
- 857 Pedreschi, D., Kelly-Quinn, M., Caffrey, J., O'Grady, M., & Mariani, S. (2014).  
858 Genetic structure of pike (*Esox lucius*) reveals a complex and previously  
859 unrecognized colonization history of Ireland. *Journal of Biogeography*, 41, 548–560.
- 860 Powels I. S., Goethals, P. L. M., Coeck, J., & Mouton, A. M. (2013). Movement  
861 patterns of adult pike (*Esox lucius* L.) in a Belgian lowland river. *Ecology of*  
862 *Freshwater Fish*, 23, 373-382.
- 863 Raat, A. J. P. (1988). *Synopsis of biological data on the northern pike Esox lucius*  
864 *Linnaeus, 1758*. Rome, Italy: FAO Fisheries Synopsis No. 30.
- 865 Raymond, M. & Rousset, F. (1995). GENEPOP (version 1.2): population genetics  
866 software for exact tests and ecumenicism. *Journal of Heredity*, 86, 248-249.
- 867 Redenbach, Z. & Taylor, E. B. (2003). Evidence for bimodal hybrid zones between  
868 two species of char (*Pisces: Salvelinus*), in northwestern North America. *Journal of*  
869 *Evolutionary Biology*, 16, 1135-1348.
- 870 Ruecker, A., Grosser, S., & Melzer, A. (1999). History and causes of reed decline at  
871 Lake Ammersee. *Limnologica*, 29, 11-20.
- 872 Seehausen, O., van Alphen, J. J. M. & Witte, F. (1997). Cichlid fish diversity  
873 threatened by eutrophication that curbs sexual selection. *Science*, 277, 1808-1811.
- 874 Sefc, K. M., Mattersdorfer, K., Ziegelbäcker, A., Neuhüttler, N., Steiner, O., Gössler,  
875 W., & Koblmüller, S. (2017). Shifting barriers and phenotypic diversification by  
876 hybridization. *Ecology Letters*, 20, 651-662.

- 877 Sexton, J. P., Hangartner, S. B., & Hoffmann, A. A. (2013). Genetic isolation by  
878 environment or distance: which pattern of gene flow is most common? *Evolution*, 68,  
879 1-15.
- 880 Skog, A., Vøllestad, L. A., Stenseth, N. C., Kasumyan, A., & Jakobsen, K. S. (2014).  
881 Circumpolar phylogeography of the northern pike (*Esox lucius*) and its relationship to  
882 the Amur pike (*E. reichertii*). *Frontiers in Zoology*, doi:10.1186/s12983-014-0067-8.
- 883 Skov, C. & Nilsson, P. A. (2018). Biology and ecology of pike. Boca Raton, Florida:  
884 CRC Press.
- 885 Sloss, B. L., Franckowiak, R. P., & Murphy, E. L. (2008). Development of new  
886 microsatellite loci and multiplex reactions for muskellunge (*Esox masquinongy*).  
887 *Molecular Ecology Resources*, 8, 811-813.
- 888 Smith, T. B. & Bernatchez, L. (2008). Evolutionary change in human-altered  
889 environments. *Molecular Ecology*, 17, 1-8.
- 890 Stelkens, R. B., Brockhurst, M. A., Hurst, G. D. D., & Greig, D. (2014). Hybridization  
891 facilitates evolutionary rescue. *Evolutionary Applications*, 7, 1209-1217.
- 892 Stemshorn, K. C., Reed, F. A., Nolte, A. W., & Tautz, D. (2011). Rapid formation of  
893 distinct hybrid lineages after secondary contact of two fish species (*Cottus spec.*).  
894 *Molecular Ecology*, 20,1475-1491.
- 895 Tamura, K., Peterson, D., Peterson, N., Stecher, G., Nei, M., & Kumar, S. (2011).  
896 MEGA5: Molecular Evolutionary Genetics Analysis using Maximum Likelihood,  
897 Evolutionary Distance, and Maximum Parsimony Methods. *Molecular Biology and*  
898 *Evolution*, 28, 2731-2739.

- 899 van Oosterhout, C., Hutchinson, W. F., Wills, D. P. M., & Shipley, P. (2004). Micro-  
900 checker: software for identifying and correcting genotyping errors in microsatellite  
901 data. *Molecular Ecology Notes*, 4, 535-538.
- 902 van Poorten, B. T., Arlinghaus, R., Daedlow, K., & Haertel-Borer, S. S. (2011).  
903 Social-ecological interactions, management panaceas, and the future of wild fish  
904 populations. *Proceedings of the National Academy of Sciences of the United States*  
905 *of America*, 108, 12554-12559.
- 906 Vonlanthen, P., Bitter, D., Hudson, A. G., Young, K. A., Müller, R., Lundsgaard-  
907 Hansen, B., ... Seehausen, O. (2012). Eutrophication causes speciation reversal in  
908 whitefish adaptive radiations. *Nature*, 482, 357-362.
- 909 Wang, J., Wang, C., Qian, L., Ma, Y., Yang, X., Jeney, Z., & Li S. (2011). Genetic  
910 characterization of 18 novel microsatellite loci in northern pike (*Esox lucius* L.).  
911 *Genetics and Molecular Biology*, 34, 169-172.
- 912 Waples, R. S., Elz, A., Arnsberg, B. D., Faulkner, J. R., Hard, J. J., Timmins-  
913 Schiffmann, E., & Park, L. K. (2017). Human-mediated evolution in a threatened  
914 species? Juvenile life-history changes in Snake River salmon. *Evolutionary*  
915 *Applications*, doi: 10.1111/eva.12468.
- 916 Waters, J. M. (2011). Competitive exclusion: phylogeography's 'elephant in the  
917 room'? *Molecular Ecology*, 20, 4388-4394.
- 918 Wennerström, L., Bekkevold, D., & Laikre, L. (2018). Biology and ecology of pike.  
919 Boca Raton, Florida: CRC Press.
- 920 Wennerström, L., Olsson, J., Ryman, N., & Laikre, L. (2016). Temporally stable, weak  
921 genetic structuring in brackish water northern pike (*Esox lucius*) in the Baltic Sea

922 indicates a contrasting divergence pattern relative to freshwater populations.

923 *Canadian Journal of Fisheries and Aquatic Sciences*, 74, 562–571.

924 Whitehead, A., Clark, B. W., Reid, N. M., Hahn, M. E., & Nacci, D. (2017). When

925 evolution is the solution to pollution: key principles, and lessons from rapid repeated

926 adaptation of killifish (*Fundulus heteroclitus*) populations. *Evolutionary Applications*,

927 10, 762-783.

928

### 929 **Legends to figures**

930 **Fig. 1:** Admixture analysis revealed three or five genetic clusters as the most likely

931 numbers, as indicated by a decrease in  $\Delta k$  and an increase in variance of calculated

932 probabilities  $P(D)$ . Only the relevant range of calculated  $k$  is shown here.

933 **Fig. 2:** Neighbor joining consensus tree based on 10,000 permutations for calculating

934 Nei's genetic distance estimator  $D_A$ . Although bootstrap values were generally low,

935 the tree topology proved to be stable and was consistent with the most likely

936 STRUCTURE model predicting three main clades. Furthermore, admixed populations

937 (labeled with a diamond) grouped according to their predicted dominant genetic

938 background within the respective clades, e.g. the RHE2 population of the river Rhine

939 groups within the Baltic Sea clade (green branches) and the GPS population

940 sampled from Großer Plöner See, which is connected with the Baltic Sea is

941 positioned in the Black Sea clade (red branches). Branches of the North Sea clade

942 are drawn in blue.

943 **Fig. 3:** Principal coordinate analysis based on pairwise  $F_{st}$  values (see Table S2) of

944 all pike samples. Despite low levels of variation (23.2% accumulated variation of axis

945 1 and 3) the three main clusters predicted by the most likely model of STRUCTURE



946 were clearly resolved and admixed pike populations were positioned within the  
947 correct genetic context.

948 **Fig. 4:** Map of Germany illustrating that genetic admixture on population level varied  
949 strongly and was not confined to a particular hydro-geographic region or river  
950 catchment therein. – Black, grey and white colors of the pie charts indicate genetic  
951 ancestry proportion of Black Sea, North Sea and Baltic Sea hydrogeographic region,  
952 respectively. Numbers indicate pooled populations as displayed in Table 3.

953 **Fig. 5:** Genetic admixture calculated per individual. Extension of a figure indicates  
954 increased numbers of individuals with a certain proportion of native ancestry (column  
955 2) or degree of hybridization (column 3). Mean values are indicated within each figure  
956 as a dot. Column 1 indicates the number of individuals analyzed per sampling site.  
957 Color code for native ancestry: green =  $NA \geq 0.5$ , yellow =  $0.25 < NA < 0.5$ ,  
958 red =  $NA \leq 0.25$ , color code for hybridization index: green =  $HI \leq 0.25$ ,  
959 yellow =  $0.25 < HI < 0.5$ , red =  $HI \geq 0.5$ .

960 **Fig. 6:** Correlation of native ancestries and hybridization indices with habitat type,  
961 strength of modification and ecological quality (1 = very good to 5 = poor according to  
962 EU water framework directive) as obtained with HGLM analysis (see Table 4 for  
963 details). Baltic coastal waters (BAL2, BAL3 and BAL4) and freshwaters without  
964 ecological information (AWU, SUS, KDO) were excluded from analysis. IDs of water  
965 bodies are explained in Table 1.

966

967 **Legends to tables**

968 **Table 1:** Sampled water bodies, type of water body and geographic positions of  
969 sampling sites within each of the three hydro-geographic regions. Sample  
970 identification (ID) is given by a three letter code, which is used throughout the text.

971 **Table 2:** High-resolution microsatellites selected according to Eschbach & Schöning  
972 (2013) for population genetic analysis of species with low genetic variability.

973 **Table 3:** Admixture analysis revealed three genetic clusters of pike populations  
974 belonging to the hydro-geographic region of the North, Baltic and Black Sea,  
975 respectively (shaded areas indicate highest proportion of ancestry). Some  
976 populations exhibited high proportions of non-native ancestry (indicated in fat italic  
977 writing). Sample IDs are explained in Table 1. Samples with the same number have  
978 been pooled for a clearer presentation in Fig. 4.

979 **Table 4:** Results of hierarchical general linear mixed modelling (HGLM) to test the  
980 effect of different linear predictors on the hybrid index (HI) and the native ancestry  
981 (NA) controlling for the random variance attributed to the individuals sampled in  
982 specific waterbodies nested within catchments (see Fig. 6). The table shows the  
983 estimates (in logit scale) and their standard error (s.e.), the t-value statistics and their  
984 p-value ( $\Pr(>|t|)$ ). Two-level interactions were non-significant in all cases and removed  
985 from the model. The estimates of the categorical variables were shown per one  
986 category with respect to the other (intercept). Significance codes: 0 '\*\*\*' 0.001 '\*\*',  
987 0.01 '\*', 0.05 and '.' 0.1.

988 **Legends to supplementary material**

989 **Fig. S1:** Pike populations showing deviations from Hardy-Weiberg equilibrium (A)  
990 and heterozygote deficiency (B).

991 **Fig. S2:** Number of loci combinations exhibiting linkage disequilibria determined with  
992 and without Bonferroni correction.

993 **Fig. S3:** Network analysis based on *cyt b* sequences. B, E and F mark the  
994 circumpolar, northern and southern clades, respectively, of the northern pike  
995 according to Skog *et al.* (2014). – The size of the circles is proportional to the number  
996 of pike individuals with a certain haplotype; color code for samples: blue = North Sea,  
997 green = Baltic Sea, orange = Black Sea hydro-geographic region, gray = reference  
998 sequences, white = a mutation step, black = a hypothetical ancestor.

999 **Table S1:** Test for evidence of null alleles. **A:** number of alleles per locus and  
1000 population (FSTAT 2.9.3.2). Total number of alleles = 6,969. **B:** Test for null alleles  
1001 (MICROCHECKER 2.2.3). Total number of putative null alleles = 112, i.e. 1.6% of  
1002 total number of alleles.

1003 **Table S2:** Pairwise  $F_{st}$  (below diagonal) and  $p$  values (above diagonal) of 53 pike  
1004 populations.  $F_{st}$  values were employed for principal coordinate analysis (Fig. 3).

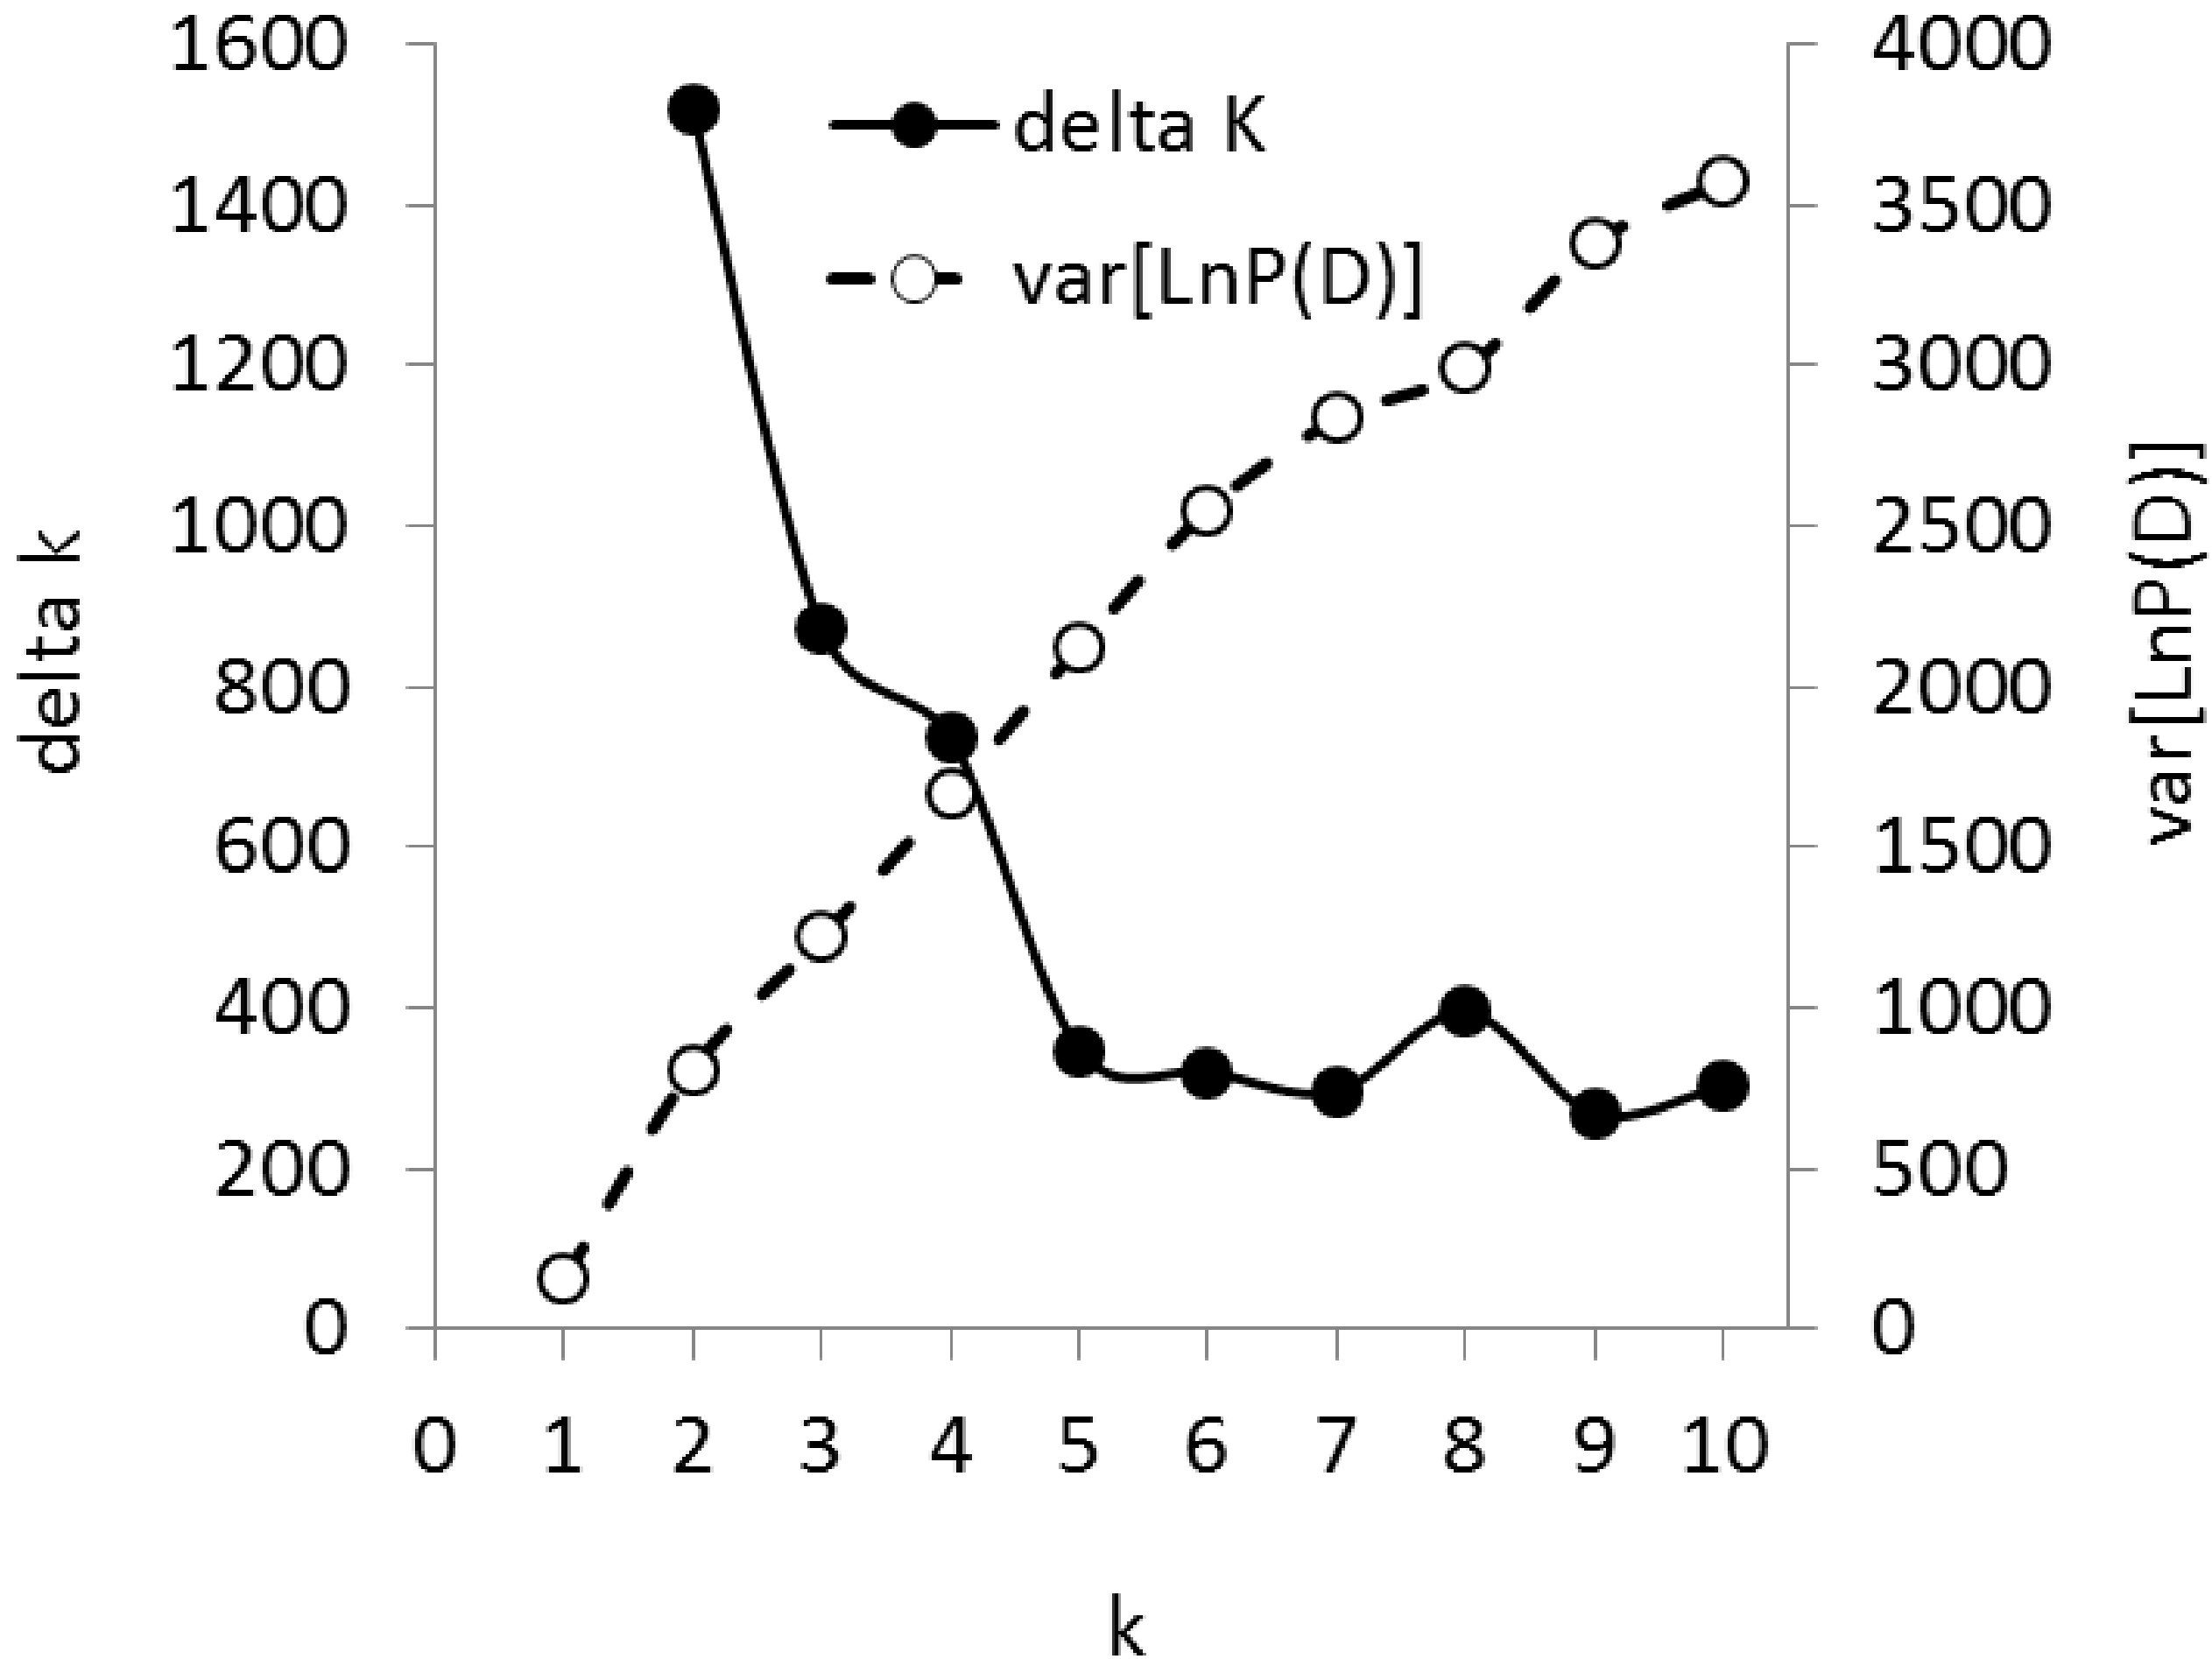

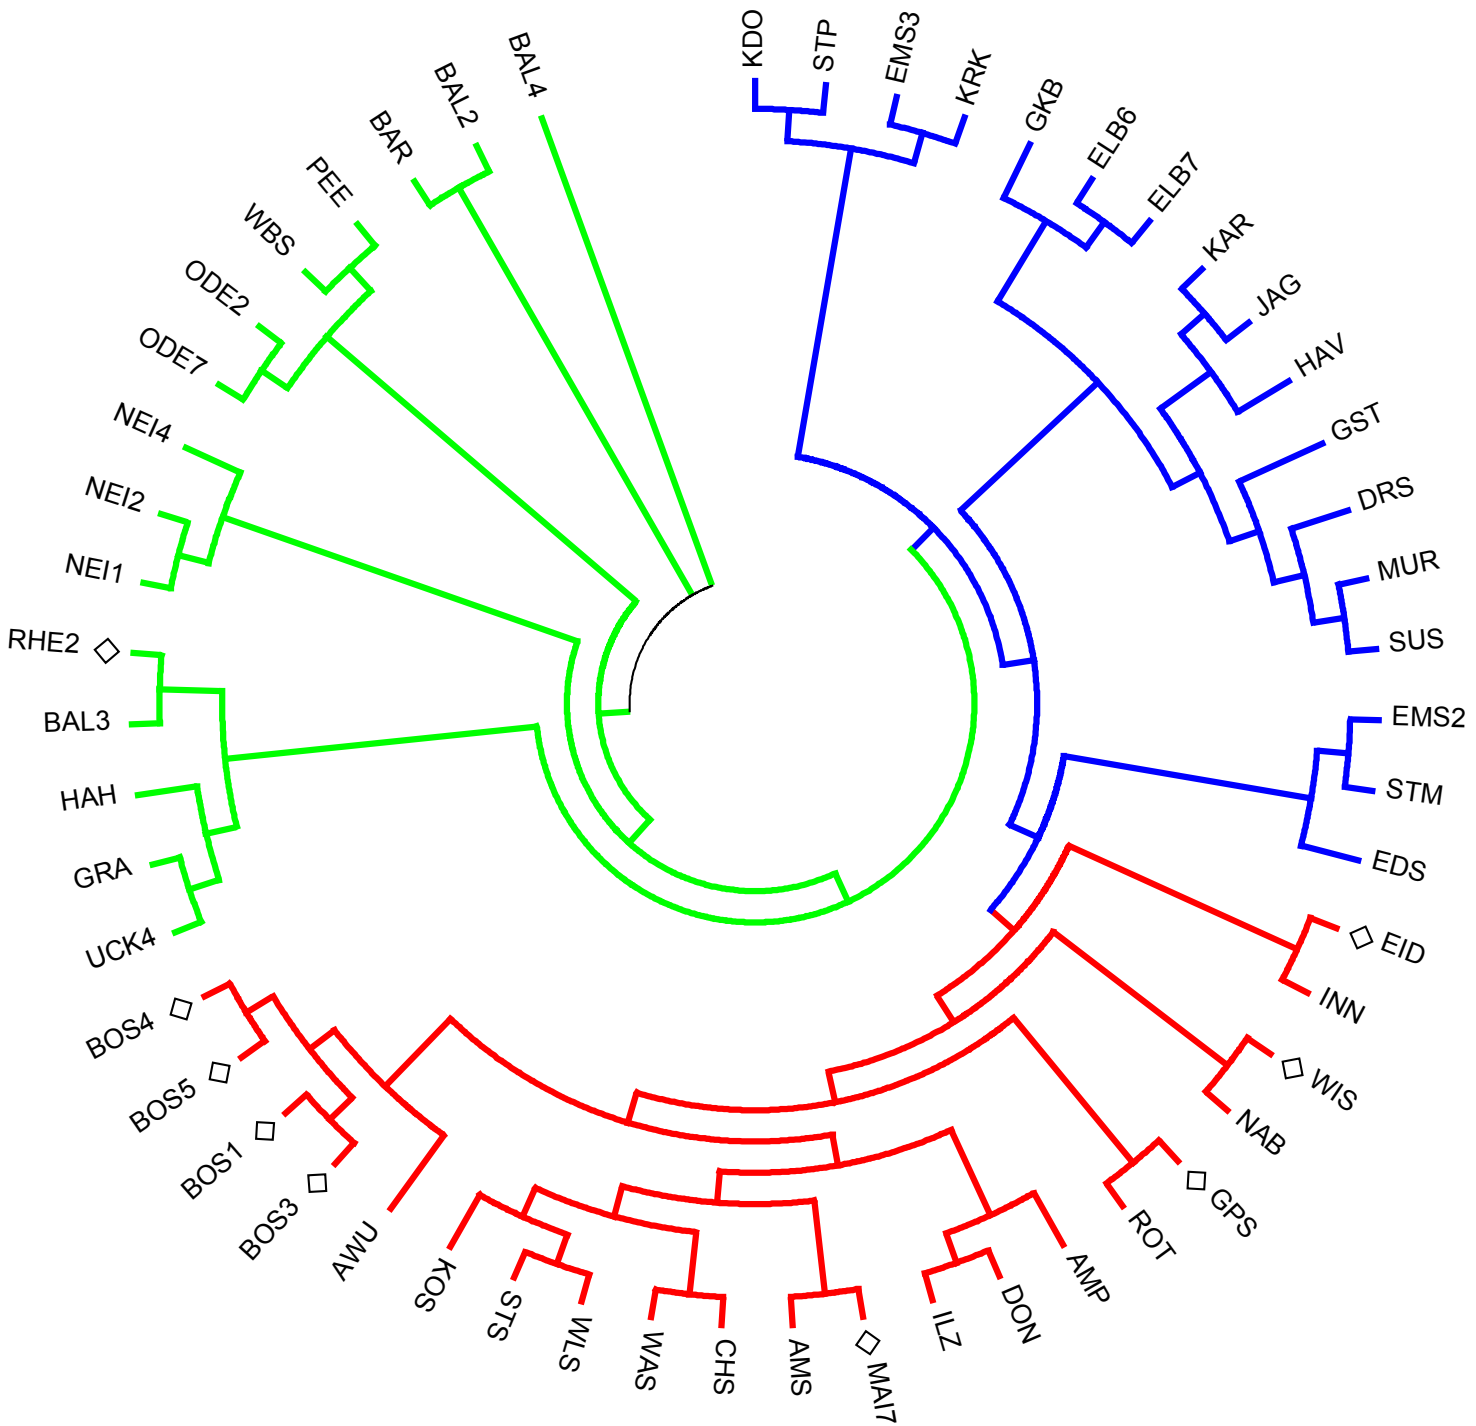

# Principal Coordinates (1 vs 3)

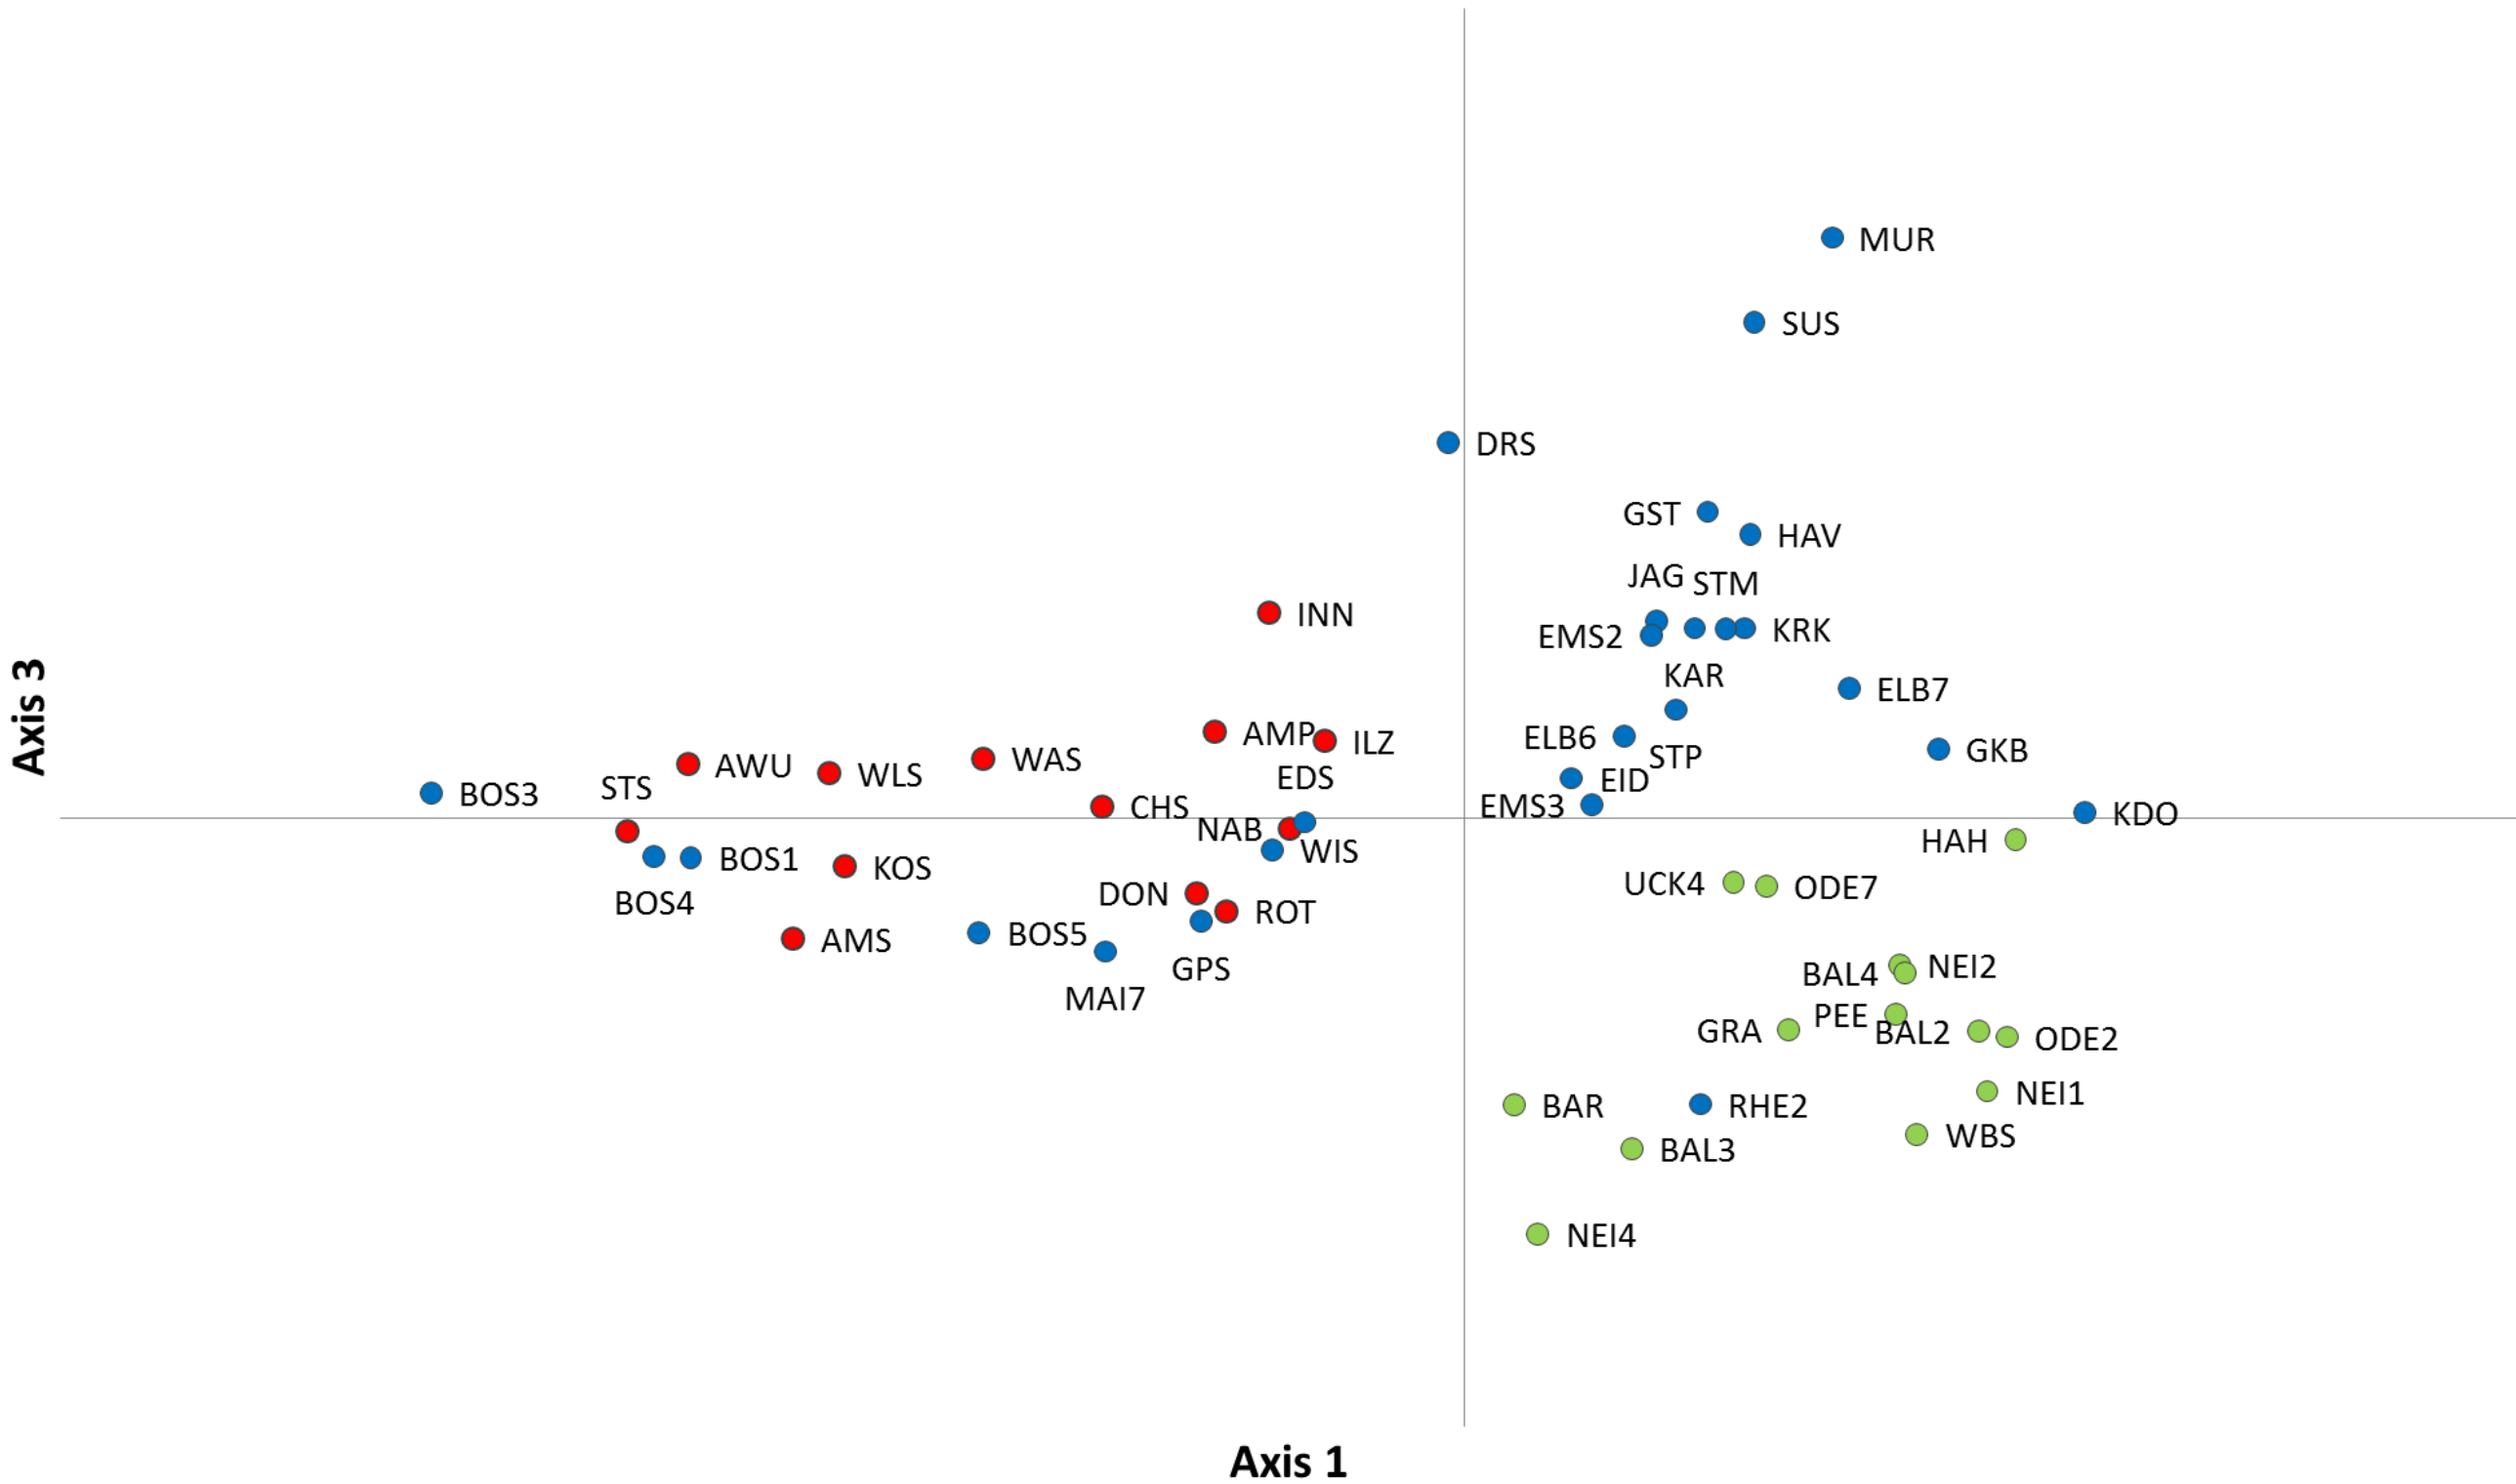

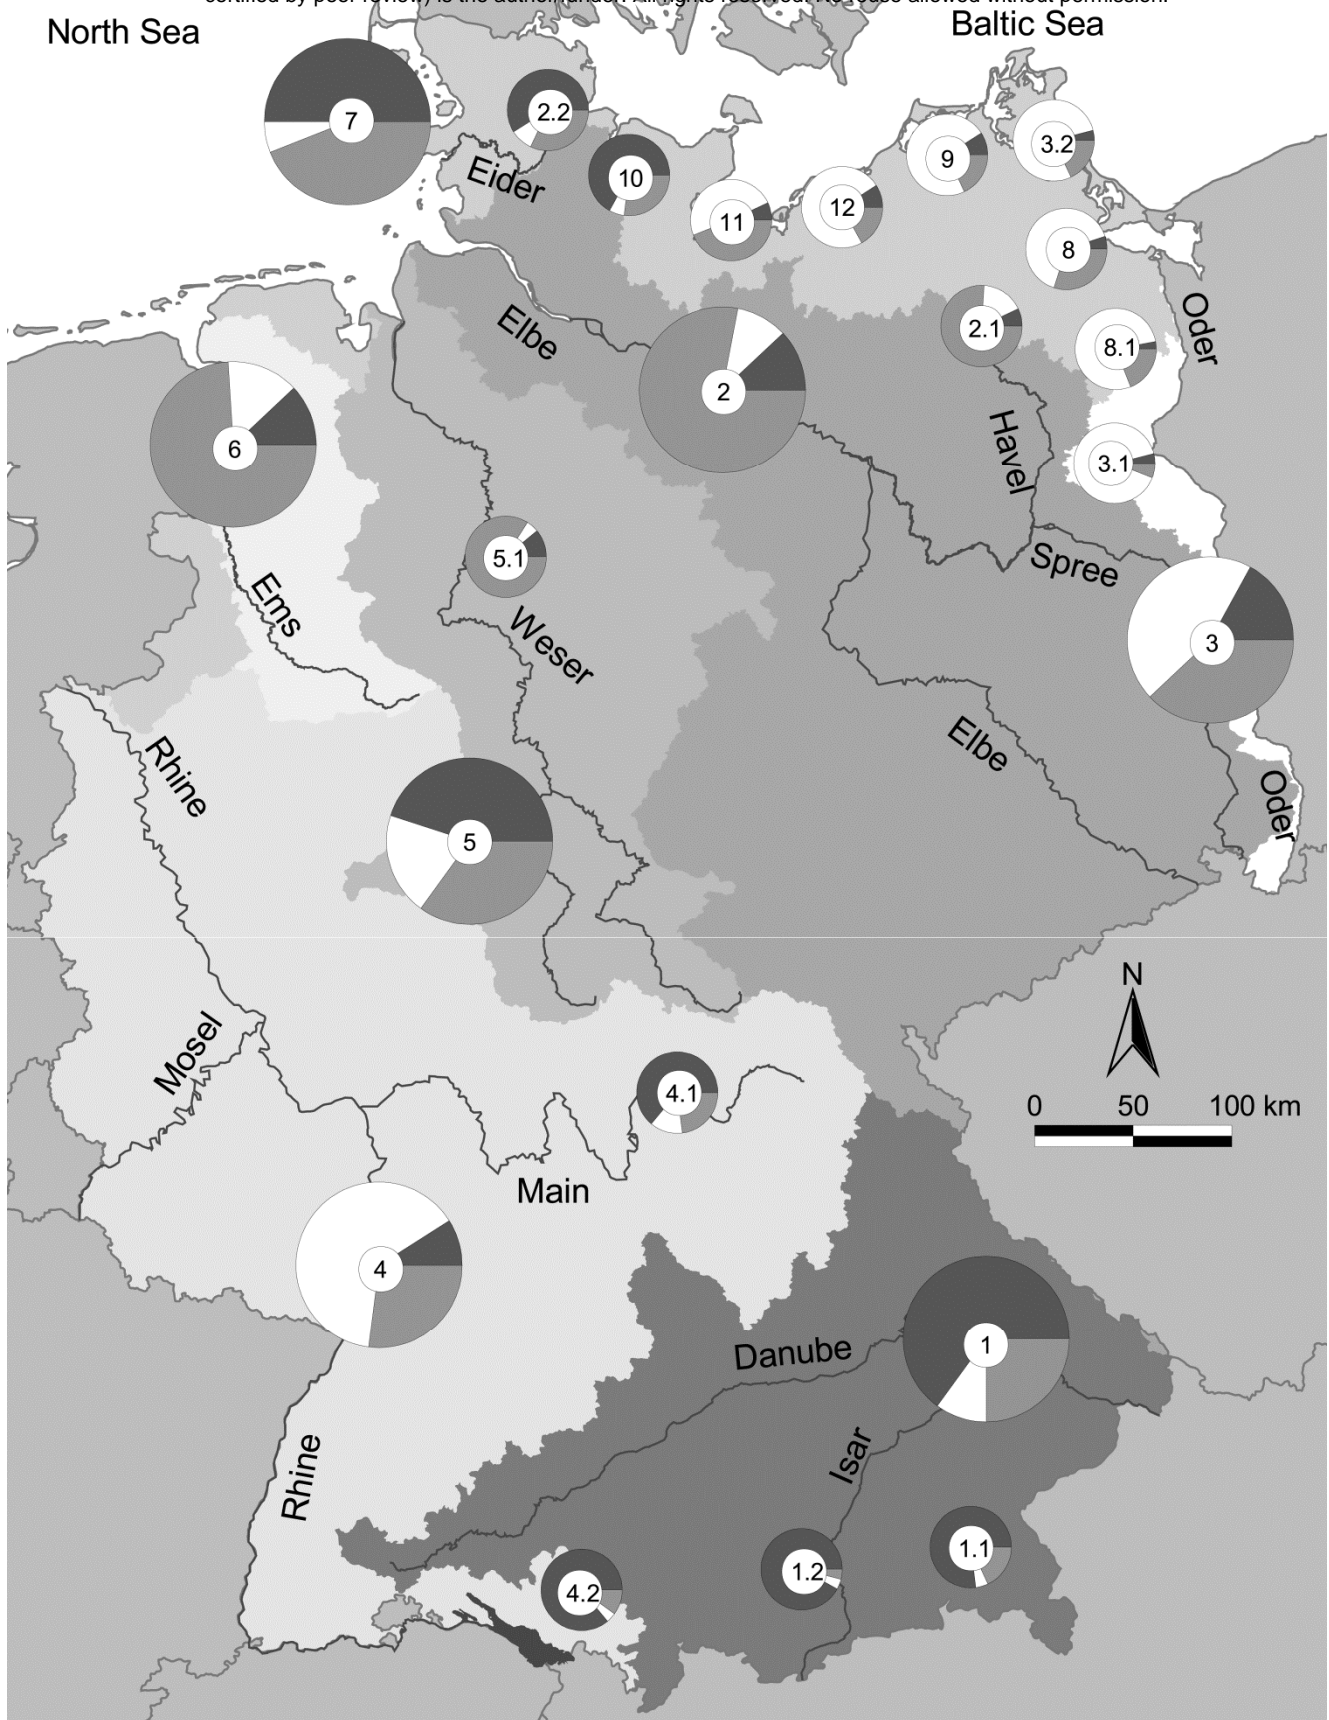



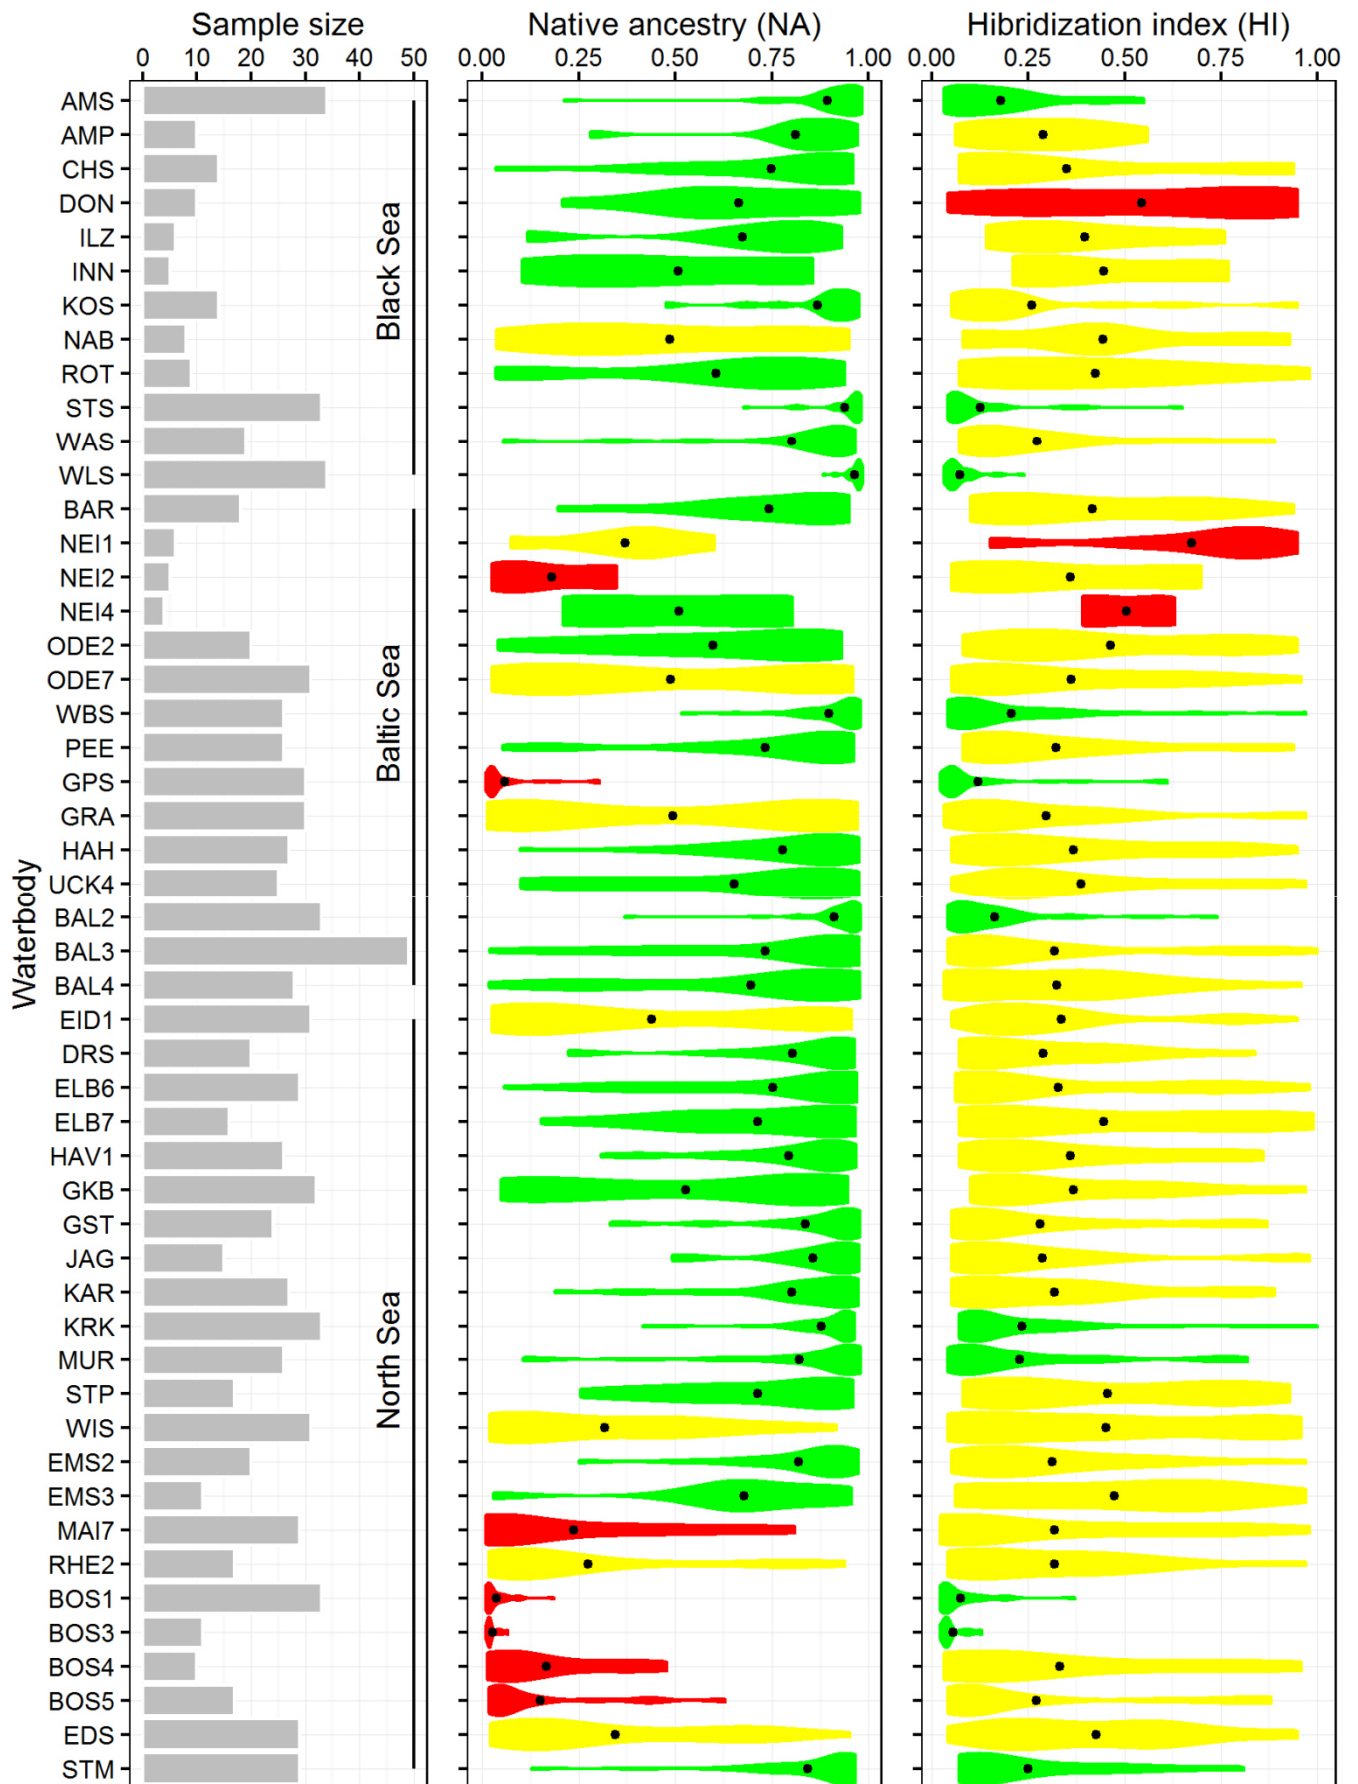



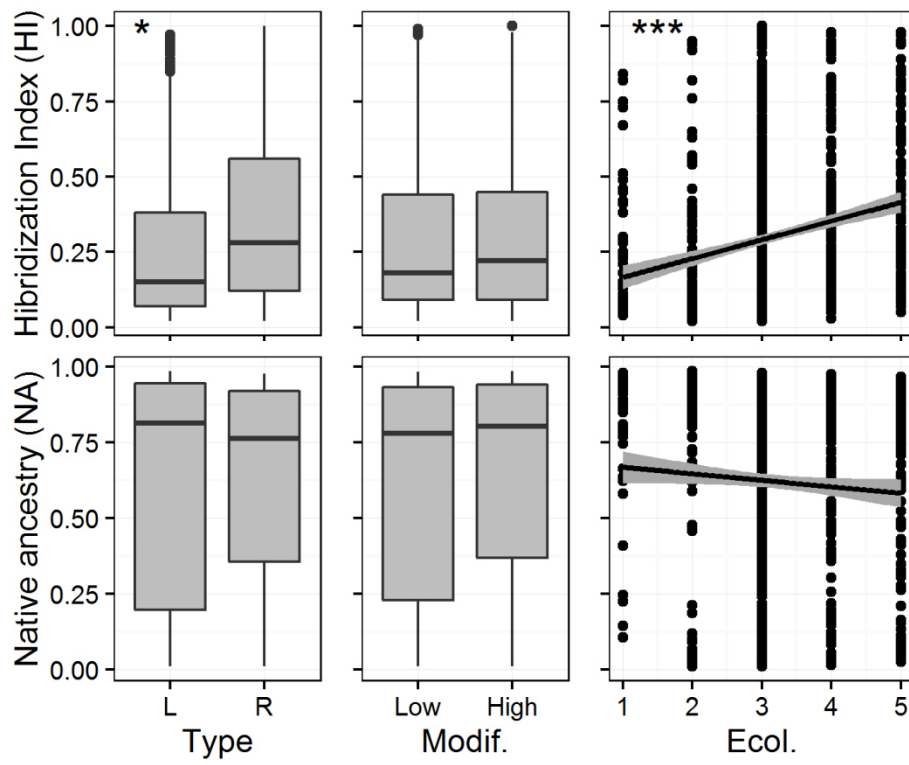

**Table 1. Sampled water bodies, type of water body and geographic positions of sampling sites** within each of the three hydro-geographic regions (HGR). Sample identification (ID) is given by a three letter code, which is used throughout the text (underlined codes indicate samples of which sub-samples have been taken to analyze the mitochondrial *cyt b* gene in addition to microsatellites).

| <b>Catchment</b>       | <b>Waterbody</b>         | <b>Type</b> | <b>ID</b>   | <b>LAT</b> | <b>LONG</b> | <b>IC</b> |
|------------------------|--------------------------|-------------|-------------|------------|-------------|-----------|
| <u>Black Sea HGR:</u>  |                          |             |             |            |             |           |
| Danube                 | Alte Würm                | r           | AWU         | 48°13' N   | 11°27' E    | <b>BY</b> |
|                        | Ammersee                 | l           | <u>AMS</u>  | 48°00' N   | 11°07' E    | <b>BY</b> |
|                        | Amper                    | r           | AMP         | 48°27' N   | 11°49' E    | <b>BY</b> |
|                        | Chiemsee                 | l           | CHS         | 47°52' N   | 12°27' E    | <b>BY</b> |
|                        | Danube                   | r           | DON         | 48°44' N   | 11°09' E    | <b>BY</b> |
|                        | Ilz                      | r           | ILZ         | 48°38' N   | 13°26' E    | <b>BY</b> |
|                        | Inn                      | r           | INN         | 48°14' N   | 12°59' E    | <b>BY</b> |
|                        | Kochelsee                | l           | KOS         | 47°39' N   | 11°21' E    | <b>BY</b> |
|                        | Naab                     | r           | <u>NAB</u>  | 49°05' N   | 11°56' E    | <b>BY</b> |
|                        | Rott                     | r           | <u>ROT</u>  | 48°23' N   | 12°45' E    | <b>BY</b> |
|                        | Starnberger See          | l           | STS         | 47°53' N   | 11°18' E    | <b>BY</b> |
|                        | Waginger See             | l           | WAS         | 47°56' N   | 12°46' E    | <b>BY</b> |
|                        | Walchen See              | l           | WLS         | 47°35' N   | 11°20' E    | <b>BY</b> |
| <u>Baltic Sea HGR:</u> |                          |             |             |            |             |           |
| Barthe                 | NN Lake (Barthe)         | l           | <u>BAR</u>  | 54°16' N   | 12°45' E    | MV        |
| Oder                   | Neiße                    | r           | NEI1        | 51°54' N   | 14°41' E    | BB        |
|                        |                          | r           | <u>NEI2</u> | 51°57' N   | 14°43' E    | BB        |
|                        |                          | r           | <u>NEI4</u> | 52°03' N   | 14°45' E    | BB        |
|                        | Oder                     | r           | <u>ODE2</u> | 53°03' N   | 14°18' E    | BB        |
|                        |                          | r           | ODE7        | 52°11' N   | 14°41' E    | BB        |
|                        | Werbellinsee             | l           | WBS         | 52°54' N   | 13°41' E    | BB        |
| Peene                  | Peene                    | r           | <u>PEE</u>  | 53°53' N   | 13°28' E    | MV        |
| Schwentine             | Großer Plöner See        | l           | <u>GPS</u>  | 54°08' N   | 10°23' E    | SH        |
| Trave                  | Großer Ratzeburger See   | l           | <u>GRA</u>  | 53°43' N   | 10°45' E    | SH        |
| Ucker                  | Hardenbecker Haussee     | l           | <u>HAH</u>  | 53°14' N   | 13°31' E    | BB        |
|                        | Ucker                    | r           | UCK4        | 53°31' N   | 13°59' E    | MV        |
| -                      | Schaproder Bodden        | c           | <u>BAL2</u> | 54°30' N   | 13°07' E    | <b>D</b>  |
| -                      | Schlei                   | c           | BAL3        | 54°30' N   | 09°40' E    | <b>D</b>  |
| -                      | Stettiner Haff           | c           | BAL4        | 53°48' N   | 14°04' E    | <b>D</b>  |
| <u>North Sea HGR:</u>  |                          |             |             |            |             |           |
| Eider                  | Eider                    | r           | <u>EID1</u> | 54°19' N   | 09°09' E    | SH        |
| Elbe                   | Drewitzer See            | l           | DRS         | 53°32' N   | 12°21' E    | MV        |
|                        | Elbe                     | r           | <u>ELB6</u> | 53°12' N   | 10°57' E    | NI        |
|                        |                          | r           | ELB7        | 51°51' N   | 12°27' E    | SN        |
|                        | Gülper See (Havel)       | l           | HAV1        | 52°44' N   | 12°15' E    | BB        |
|                        | Großer Kossenblatter See | l           | GKB         | 52°08' N   | 14°06' E    | BB        |

| Catchment                     | Waterbody          | Type | ID          | LAT      | LONG     | IC |
|-------------------------------|--------------------|------|-------------|----------|----------|----|
|                               | Großer Stechlinsee | l    | GST         | 53°09' N | 13°01' E | BB |
|                               | Jäglitz            | r    | JAG         | 52°52' N | 12°24' E | BB |
| <u>North Sea HGR (cont.):</u> |                    |      |             |          |          |    |
|                               | Karthane           | r    | KAR         | 52°59' N | 11°47' E | BB |
|                               | Kleiner Döllnsee   | l    | KDO         | 52°59' N | 13°34' E | BB |
|                               | Krainke            | r    | KRK         | 53°13' N | 11°04' E | NI |
|                               | Müritz             | l    | <u>MUR</u>  | 53°25' N | 12°41' E | MV |
|                               | Schulzensee        | l    | SUS         | 53°09' N | 13°15' E | BB |
|                               | Schwarze Elster    | r    | STP         | 51°28' N | 13°26' E | BB |
|                               | Wittensee          | l    | <u>WIS</u>  | 54°23' N | 09°44' E | SH |
| Ems                           | Ems                | r    | EMS3        | 52°58' N | 07°18' E | NI |
|                               | Hieve              | l    | <u>EMS2</u> | 53°24' N | 07°16' E | NI |
| Rhine                         | Main               | r    | <u>MAI7</u> | 50°01' N | 10°31' E | BY |
|                               | Rhine              | r    | <u>RHE2</u> | 49°09' N | 08°22' E | BW |
|                               | Lake Constance     | l    | <u>BOS1</u> | 47°41' N | 09°02' E | BW |
|                               |                    | l    | BOS3        | 47°43' N | 09°13' E | BW |
|                               |                    | l    | BOS4        | 47°33' N | 09°37' E | BW |
|                               |                    | l    | BOS5        | 47°35' N | 09°31' E | BW |
| Weser                         | Edersee            | l    | <u>EDS</u>  | 51°11' N | 09°03' E | HE |
|                               | Steinhuder Meer    | l    | <u>STM</u>  | 52°28' N | 09°19' E | NI |

Type = type of waterbody: r = river, l = lake, c = coast, NN = no name; ID = sample identification code; geographic coordinates: LAT = latitude north (N), LONG = longitude east (E); IC = German federal state identification code: BB = Brandenburg, BW = Baden-Württemberg, BY = Bavaria, HE = Hesse, MV = Mecklenburg-Vorpommern, NI = Lower Saxony, SH = Schleswig-Holstein, SN = Saxony; HGR = hydro-geographic region; NN = name unknown.

**Table 2:** High-resolution microsatellites selected according to Eschbach & Schöning (2013) for population genetic analysis of species with low genetic variability.

| Loci    | References | 5'- label | Multiplex No. | A <sub>T</sub> | A <sub>M</sub> | H <sub>O</sub> | H <sub>S</sub> |
|---------|------------|-----------|---------------|----------------|----------------|----------------|----------------|
| Elu87   | 1          | NED       |               | 13             | 4,9            | 0,56           | 0,58           |
| Eluc045 | 2          | FAM       | 1             | 26             | 6,7            | 0,66           | 0,67           |
| B451    | 3          | HEX       |               | 37             | 13,3           | 0,79           | 0,89           |
| PkB47   | 4          | FAM       |               | 18             | 6,1            | 0,50           | 0,53           |
| Elu19   | 5          | NED       | 2             | 20             | 4,5            | 0,43           | 0,46           |
| EL02    | 6          | HEX       |               | 24             | 7,6            | 0,61           | 0,75           |
| PkB16   | 4          | NED       |               | 37             | 14,5           | 0,79           | 0,92           |
| Elu76   | 5          | FAM       |               | 23             | 7,3            | 0,61           | 0,71           |
| EL27    | 6          | NED       | 3             | 16             | 5,8            | 0,68           | 0,69           |
| EmaD12a | 7          | HEX       |               | 34             | 12,9           | 0,86           | 0,90           |
| EL01    | 6          | FAM       |               | 25             | 6,6            | 0,61           | 0,64           |
| EluB108 | 8          | FAM       |               | 14             | 5,2            | 0,60           | 0,60           |
| EluBe   | 8          | NED       | 4             | 9              | 3,5            | 0,61           | 0,54           |
| B24     | 3          | HEX       |               | 28             | 10,9           | 0,86           | 0,88           |
| Eluc033 | 2          | NED       |               | 20             | 6,7            | 0,64           | 0,66           |

References: 1 = Miller & Kapuscinski, 1996; 2 = Wang et al., 2011; 3 = Aguilar et al., 2005; 4 = Wildlife Forensics Laboratory, California, USA (internal report); 5 = Miller & Kapuscinski, 1997; 6 = Ouellet-Cauchon et al., 2014; 7 = Sloss et al., 2008; 8 = Launey et al., 2003; NED, FAM and HEX are fluorescent dyes; A<sub>T</sub> = total number of different alleles over all populations, A<sub>M</sub> = mean number of different alleles per population, H<sub>O</sub> = observed heterozygosity, H<sub>S</sub> = heterozygosity according to Nei & Chesser (1983).

**Table 3:** Admixture analysis revealed three genetic clusters of pike populations belonging to the hydrogeographic regions of the North, Baltic and Black Sea, respectively (shaded areas indicate highest proportion of ancestry). Some populations exhibited high shares of non-native ancestry (indicated in fat italic writing).

| ID*  | no. in Fig. 4 | Proportion of ancestry: |            |              | ID   | no. in Fig. 4 | Proportion of ancestry: |              |              |
|------|---------------|-------------------------|------------|--------------|------|---------------|-------------------------|--------------|--------------|
|      |               | North Sea               | Baltic Sea | Black Sea    |      |               | North Sea               | Baltic Sea   | Black Sea    |
| AMP  | 1             | 0,140                   | 0,048      | 0,812        | ODE2 | 3             | 0,306                   | 0,598        | 0,096        |
| AWU  | 1             | 0,138                   | 0,040      | 0,821        | ODE7 | 3             | 0,416                   | 0,487        | 0,097        |
| DON  | 1             | 0,225                   | 0,111      | 0,664        | NEI1 | 3             | <b>0,450</b>            | 0,370        | 0,181        |
| ILZ  | 1             | 0,218                   | 0,108      | 0,674        | NEI2 | 3             | <b>0,629</b>            | 0,180        | 0,191        |
| INN  | 1             | 0,278                   | 0,215      | 0,507        | NEI4 | 3             | 0,176                   | 0,509        | 0,316        |
| NAB  | 1             | 0,407                   | 0,106      | 0,487        | WBS  | 3.1           | 0,068                   | 0,897        | 0,035        |
| ROT  | 1             | 0,312                   | 0,084      | 0,605        | BAL2 | 3.2           | 0,066                   | 0,911        | 0,022        |
| CHS  | 1.1           | 0,188                   | 0,063      | 0,750        | BAL3 | 3.2           | 0,218                   | 0,733        | 0,050        |
| WAS  | 1.1           | 0,169                   | 0,031      | 0,801        | BAL4 | 3.2           | 0,263                   | 0,695        | 0,042        |
| AMS  | 1.2           | 0,037                   | 0,070      | 0,894        | RHE2 | 4             | 0,275                   | <b>0,636</b> | 0,089        |
| KOS  | 1.2           | 0,093                   | 0,039      | 0,867        | MAI7 | 4.1           | 0,236                   | 0,127        | <b>0,637</b> |
| STS  | 1.2           | 0,036                   | 0,026      | 0,937        | BOS1 | 4.2           | 0,037                   | 0,059        | <b>0,904</b> |
| WLS  | 1.2           | 0,021                   | 0,015      | 0,963        | BOS3 | 4.2           | 0,027                   | 0,019        | <b>0,954</b> |
| ELB6 | 2             | 0,752                   | 0,043      | 0,205        | BOS4 | 4.2           | 0,166                   | 0,043        | <b>0,791</b> |
| ELB7 | 2             | 0,714                   | 0,155      | 0,131        | BOS5 | 4.2           | 0,150                   | 0,044        | <b>0,806</b> |
| HAV1 | 2             | 0,793                   | 0,097      | 0,110        | EDS  | 5             | 0,345                   | 0,204        | <b>0,451</b> |
| KAR  | 2             | 0,801                   | 0,104      | 0,095        | STM  | 5.1           | 0,843                   | 0,051        | 0,107        |
| JAG  | 2             | 0,855                   | 0,062      | 0,083        | EMS3 | 6             | 0,677                   | 0,195        | 0,128        |
| KRK  | 2             | 0,878                   | 0,078      | 0,044        | EMS2 | 6             | 0,819                   | 0,076        | 0,105        |
| STP  | 2             | 0,713                   | 0,142      | 0,144        | EID1 | 7             | 0,439                   | 0,060        | <b>0,501</b> |
| MUR  | 2.1           | 0,821                   | 0,157      | 0,023        | UCK4 | 8             | 0,299                   | 0,653        | 0,048        |
| SUS  | 2.1           | 0,952                   | 0,026      | 0,021        | HAH  | 8.1           | 0,188                   | 0,778        | 0,034        |
| GST  | 2.1           | 0,837                   | 0,054      | 0,108        | PEE  | 9             | 0,183                   | 0,732        | 0,085        |
| GKB  | 2.1           | 0,527                   | 0,375      | 0,097        | GPS  | 10            | 0,270                   | 0,059        | <b>0,671</b> |
| KDO  | 2.1           | 0,649                   | 0,308      | 0,043        | GRA  | 11            | 0,439                   | 0,494        | 0,068        |
| DRS  | 2.1           | 0,802                   | 0,078      | 0,120        | BAR  | 12            | 0,169                   | 0,743        | 0,088        |
| WIS  | 2.2           | 0,317                   | 0,095      | <b>0,588</b> |      |               |                         |              |              |

\* See Table 1 for definition of sample IDs. Samples with the same number have been pooled for a clearer presentation in Fig. 4

**Table 4:** Results of hierarchical general linear mixed modelling (HGML) to test the effect of different linear predictors on the hybrid index (HI) and the native ancestry (NA) controlling for the random variance attributed to the individuals sampled in specific waterbodies nested within catchments (see Fig. 6). The table shows the estimates (in logit scale) and their standard error (s.e.), the t-value statistics and their p-value (Pr(>|t|)). Two-level interactions were non-significant in all cases and removed from the model. The estimates of the categorical variables were shown per one category with respect to the other (intercept). Significance codes: 0 '\*\*\*' 0.001 '\*\*', 0.01 '\*', 0.05 and '.' 0.1.

| Hybrid index        | Estimate | s.e   | t-value | Pr(> t ) |     |
|---------------------|----------|-------|---------|----------|-----|
| (Intercept)         | -1.401   | 0.176 | -7.98   | <0.001   | *** |
| Type (river)        | 0.376    | 0.119 | 3.16    | <0.01    | *   |
| Modification (high) | -0.128   | 0.125 | -1.03   | 0.3      |     |
| Ecological Status   | 0.186    | 0.053 | 3.49    | <0.001   | *** |

  

| Native ancestry     | Estimate | s.e   | t-value | Pr(> t ) |  |
|---------------------|----------|-------|---------|----------|--|
| (Intercept)         | 0.731    | 0.44  | 1.66    | 0.096    |  |
| Type (river)        | -0.247   | 0.239 | -1.030  | 0.301    |  |
| Modification (high) | 0.389    | 0.266 | 1.460   | 0.143    |  |
| Ecological Status   | -0.16    | 0.104 | -1.550  | 0.122    |  |
