# Supplementary material for: Intraspecific population admixture of a top piscivore correlates with anthropogenic alteration of freshwater ecosystems
Source: bioRxiv or medRxiv preprint supplement (doi:10.1101/677856), 2019-07-02
Supplement: Supplementary file [file media-1.pdf]

A

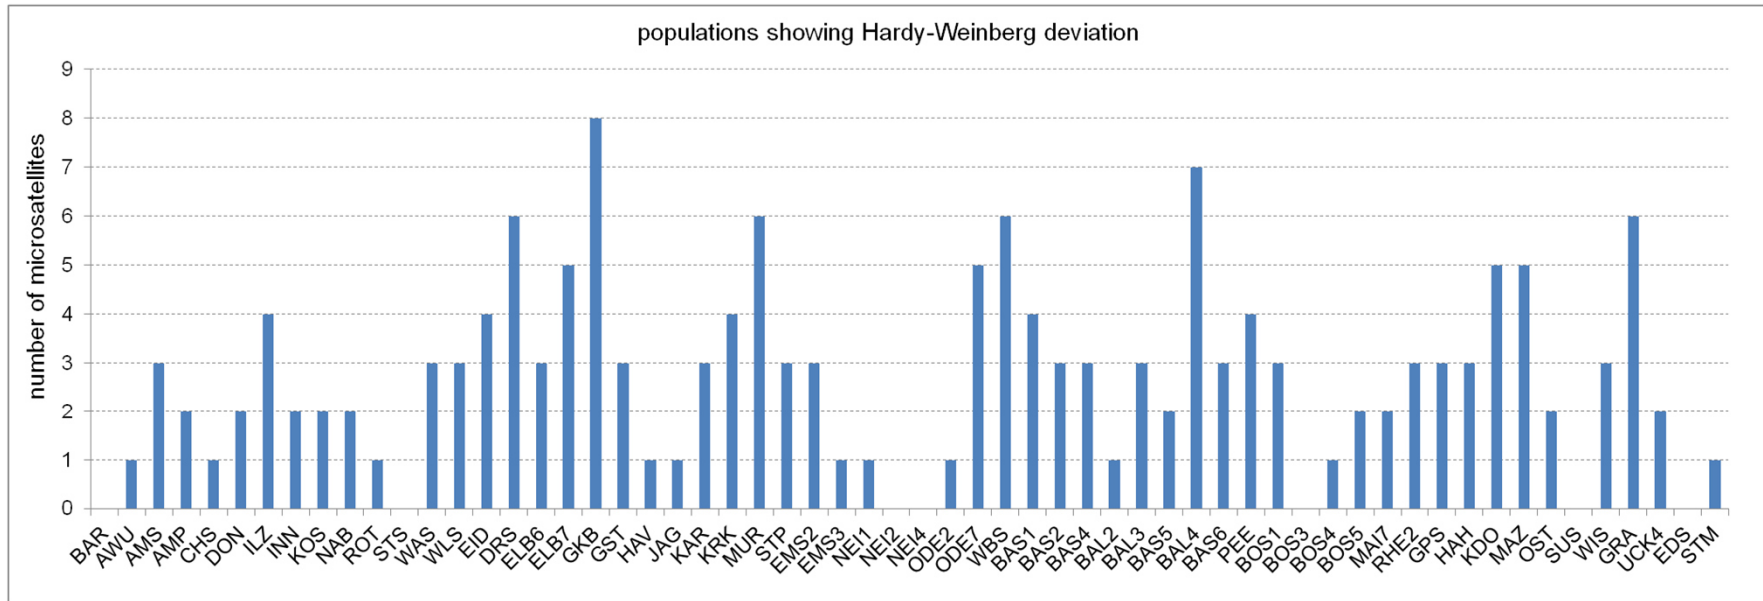

B

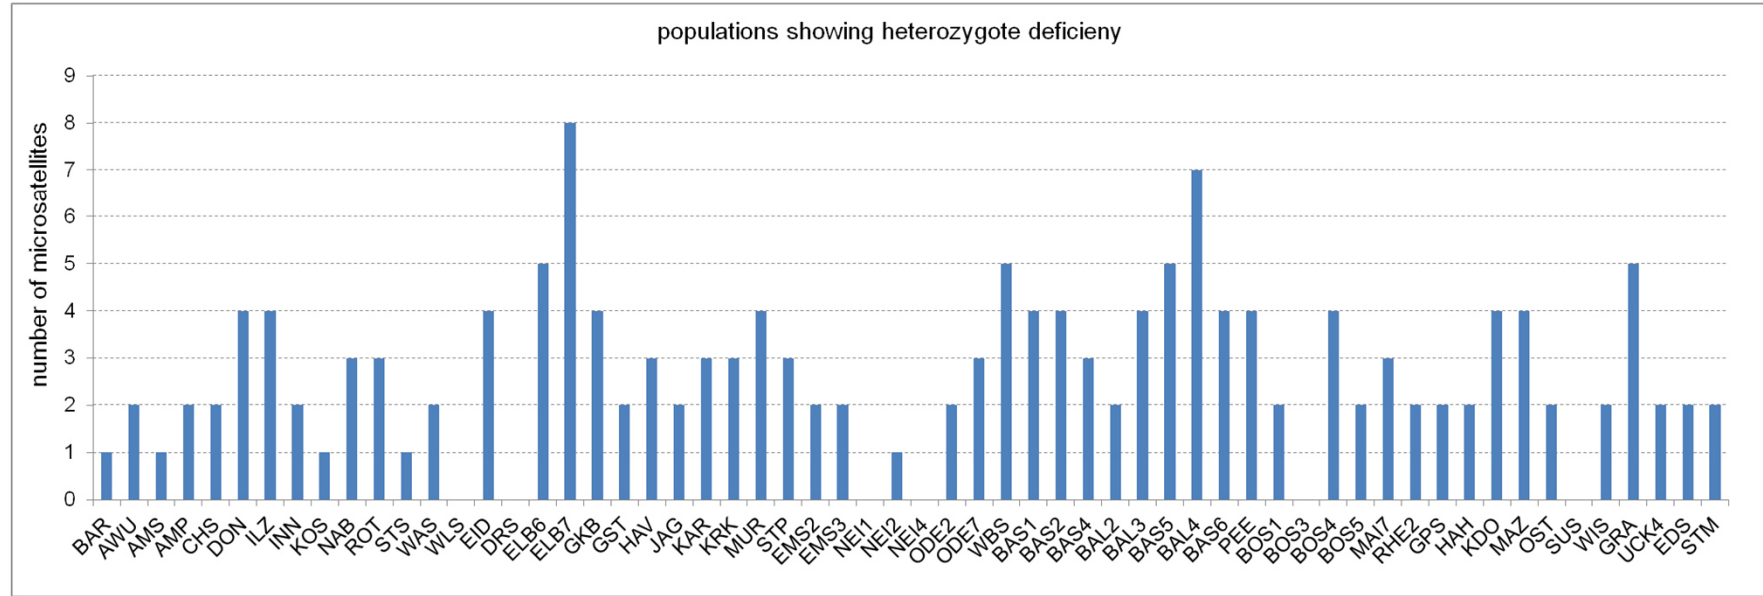

Fig. S1: Pike populations showing deviations from Hardy-Weinberg equilibrium (A) and heterozygote deficiency (B).
