# Supplementary material for: Intraspecific population admixture of a top piscivore correlates with anthropogenic alteration of freshwater ecosystems
Source: bioRxiv or medRxiv preprint supplement (doi:10.1101/677856), 2019-07-02
Supplement: Supplementary file [file media-2.pdf]

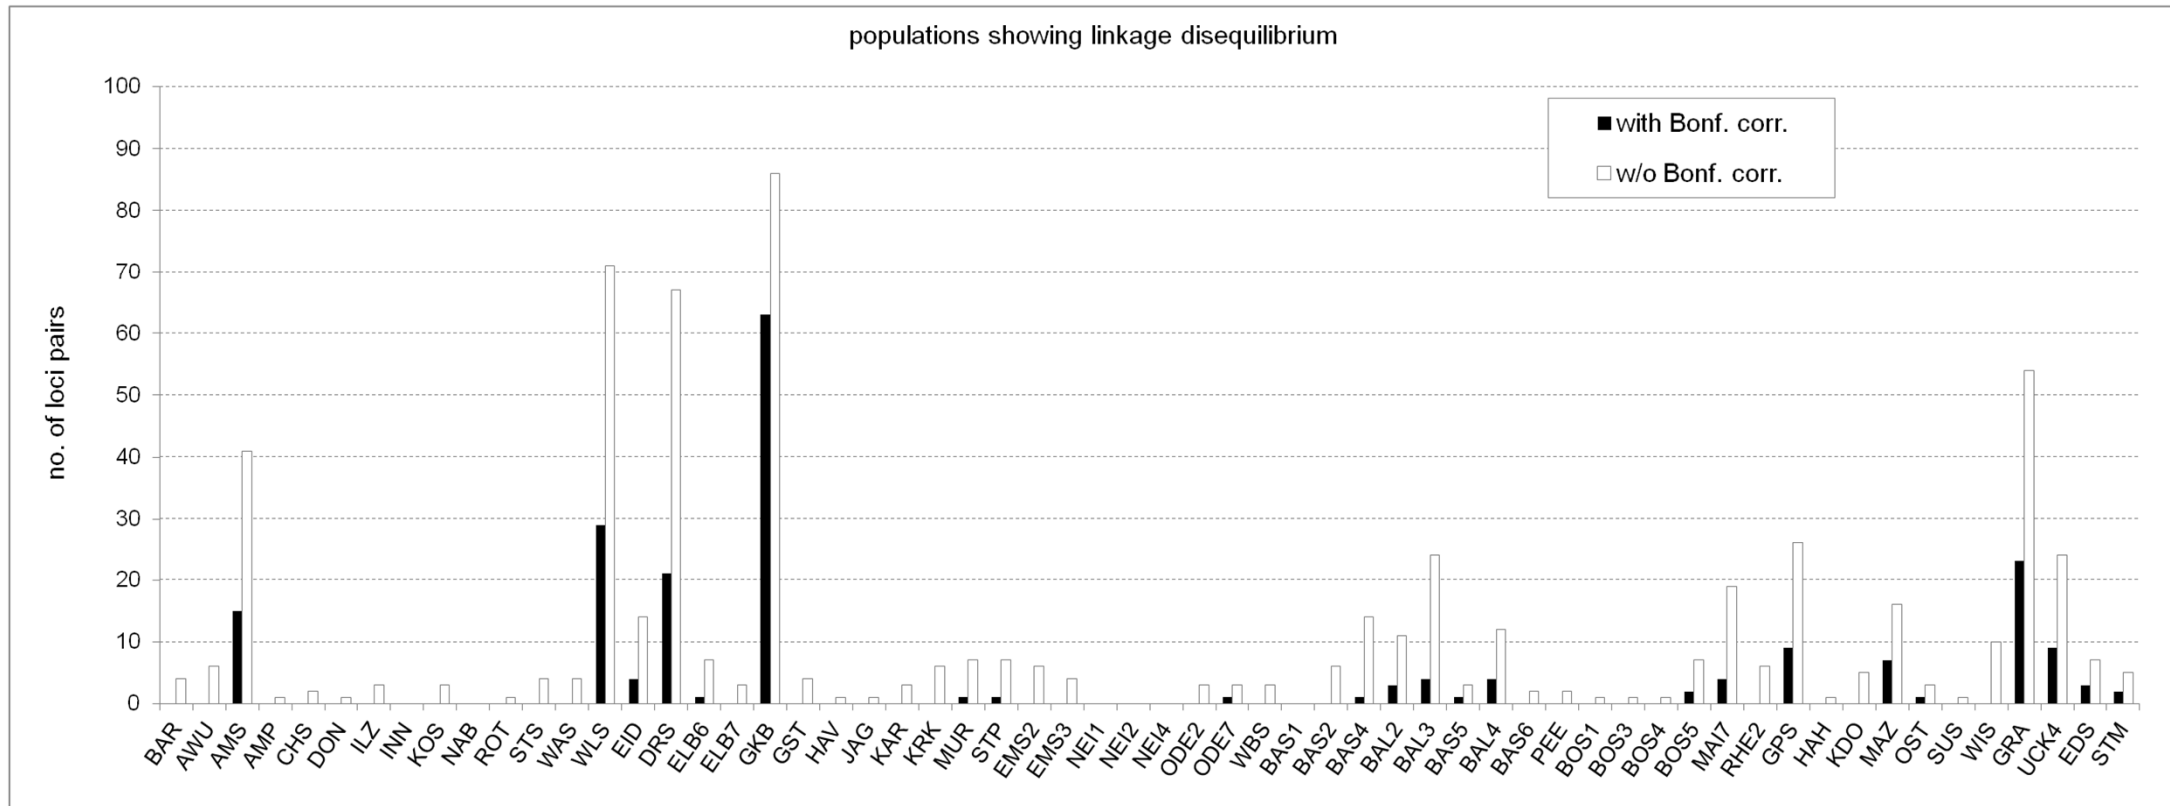

**Fig. S2:** Number of loci combinations exhibiting linkage disequilibria determined with and without Bonferroni correction.
