# Supplementary material for: Intraspecific population admixture of a top piscivore correlates with anthropogenic alteration of freshwater ecosystems
Source: bioRxiv or medRxiv preprint supplement (doi:10.1101/677856), 2019-07-02
Supplement: Supplementary file [file media-4.pdf]

**Table S1:** Test for evidence of null alleles. **A:** number of alleles per locus and population (FSTAT 2.9.3.2). Total number of alleles = 6969. **B:** Test for null alleles (MICROCHECKER 2.2.3). Total number of putative null alleles = 112, i.e. 1.6% of total number of alleles.

**A**

| loci    | BAR | AWU | AMS | AMP | CHS | DON | ILZ | INN | KOS | NAB | ROT | STS | WAS | WLS | EID |
|---------|-----|-----|-----|-----|-----|-----|-----|-----|-----|-----|-----|-----|-----|-----|-----|
| Elu87   | 3   | 4   | 9   | 5   | 6   | 7   | 4   | 3   | 5   | 3   | 4   | 7   | 7   | 4   | 3   |
| Eluc045 | 6   | 4   | 10  | 8   | 8   | 6   | 5   | 6   | 10  | 8   | 6   | 8   | 8   | 8   | 8   |
| B451    | 15  | 11  | 19  | 11  | 11  | 11  | 7   | 6   | 15  | 11  | 11  | 13  | 11  | 11  | 15  |
| PkB47   | 5   | 5   | 7   | 7   | 8   | 5   | 5   | 4   | 5   | 6   | 7   | 8   | 6   | 8   | 5   |
| Elu19   | 6   | 4   | 6   | 3   | 4   | 5   | 4   | 6   | 6   | 4   | 4   | 8   | 4   | 4   | 4   |
| EI02    | 7   | 5   | 11  | 6   | 8   | 7   | 6   | 2   | 6   | 4   | 6   | 8   | 5   | 5   | 7   |
| Pkb16   | 15  | 6   | 15  | 11  | 11  | 10  | 7   | 7   | 12  | 11  | 10  | 16  | 16  | 13  | 18  |
| Elu76   | 6   | 7   | 8   | 7   | 9   | 8   | 5   | 4   | 7   | 5   | 7   | 8   | 7   | 5   | 10  |
| EL27    | 4   | 6   | 6   | 4   | 5   | 6   | 5   | 3   | 5   | 6   | 6   | 5   | 6   | 4   | 8   |
| EmaD12a | 14  | 8   | 13  | 10  | 11  | 13  | 7   | 7   | 14  | 9   | 7   | 14  | 12  | 10  | 13  |
| EL01    | 4   | 6   | 10  | 7   | 8   | 7   | 5   | 3   | 4   | 6   | 7   | 7   | 6   | 6   | 8   |
| EluB108 | 5   | 2   | 4   | 4   | 6   | 5   | 4   | 3   | 5   | 5   | 3   | 4   | 3   | 4   | 5   |
| EluBe   | 3   | 2   | 5   | 5   | 4   | 4   | 3   | 3   | 3   | 2   | 3   | 3   | 3   | 4   | 3   |
| B24     | 8   | 8   | 12  | 9   | 10  | 11  | 7   | 6   | 13  | 11  | 10  | 16  | 11  | 11  | 12  |
| Eluc033 | 10  | 4   | 12  | 7   | 6   | 10  | 3   | 2   | 6   | 4   | 6   | 7   | 9   | 7   | 7   |

| loci    | DRS | ELB6 | ELB7 | GKB | GST | HAV | JAG | KAR | KRK | MUR | STP | EMS2 | EMS3 | NEI1 | NEI2 |
|---------|-----|------|------|-----|-----|-----|-----|-----|-----|-----|-----|------|------|------|------|
| Elu87   | 5   | 7    | 5    | 6   | 6   | 5   | 5   | 7   | 6   | 5   | 4   | 4    | 3    | 3    | 3    |
| Eluc045 | 4   | 6    | 4    | 7   | 5   | 6   | 4   | 5   | 4   | 4   | 7   | 6    | 4    | 3    | 2    |
| B451    | 6   | 13   | 13   | 15  | 15  | 21  | 16  | 19  | 20  | 8   | 12  | 7    | 9    | 8    | 9    |
| PkB47   | 4   | 5    | 9    | 10  | 9   | 9   | 7   | 11  | 7   | 7   | 6   | 10   | 5    | 5    | 5    |
| Elu19   | 3   | 5    | 4    | 3   | 6   | 4   | 4   | 7   | 5   | 4   | 4   | 4    | 2    | 2    | 2    |
| EI02    | 5   | 9    | 10   | 12  | 9   | 1   | 10  | 11  | 8   | 13  | 6   | 6    | 7    | 6    | 4    |
| Pkb16   | 13  | 17   | 17   | 22  | 16  | 20  | 14  | 21  | 21  | 18  | 11  | 16   | 16   | 8    | 6    |
| Elu76   | 5   | 5    | 8    | 7   | 7   | 7   | 6   | 9   | 8   | 6   | 6   | 8    | 6    | 5    | 6    |
| EL27    | 6   | 9    | 5    | 5   | 5   | 9   | 7   | 8   | 9   | 6   | 8   | 7    | 4    | 4    | 5    |
| EmaD12a | 11  | 15   | 15   | 14  | 13  | 14  | 10  | 16  | 13  | 14  | 10  | 13   | 8    | 9    | 8    |
| EL01    | 5   | 7    | 7    | 8   | 6   | 5   | 7   | 6   | 7   | 4   | 9   | 5    | 5    | 4    | 3    |
| EluB108 | 6   | 7    | 7    | 6   | 5   | 7   | 3   | 7   | 6   | 6   | 4   | 6    | 5    | 5    | 6    |
| EluBe   | 2   | 4    | 4    | 4   | 3   | 5   | 4   | 4   | 3   | 3   | 4   | 3    | 3    | 3    | 3    |
| B24     | 9   | 12   | 8    | 12  | 13  | 10  | 11  | 11  | 14  | 10  | 11  | 12   | 8    | 7    | 4    |
| Eluc033 | 5   | 7    | 7    | 10  | 10  | 10  | 7   | 8   | 8   | 8   | 3   | 6    | 6    | 5    | 4    |

| loci    | NEI4 | ODE2 | ODE7 | WBS | BAS1 | BAS2 | BAS4 | BAL2 | BAL3 | BAS5 | BAL4 | BAS6 | PEE | BOS1 | BOS3 |
|---------|------|------|------|-----|------|------|------|------|------|------|------|------|-----|------|------|
| Elu87   | 5    | 5    | 5    | 5   | 4    | 5    | 5    | 5    | 5    | 5    | 5    | 6    | 6   | 6    | 5    |
| Eluc045 | 4    | 10   | 10   | 9   | 8    | 12   | 5    | 6    | 4    | 6    | 7    | 10   | 10  | 9    | 6    |
| B451    | 6    | 20   | 18   | 14  | 11   | 15   | 15   | 21   | 16   | 16   | 20   | 14   | 19  | 17   | 12   |
| PkB47   | 2    | 7    | 7    | 5   | 7    | 7    | 5    | 6    | 6    | 3    | 5    | 7    | 8   | 8    | 5    |
| Elu19   | 2    | 5    | 6    | 5   | 4    | 7    | 6    | 7    | 4    | 7    | 7    | 6    | 4   | 5    | 4    |
| EI02    | 4    | 1    | 6    | 8   | 8    | 13   | 8    | 3    | 14   | 12   | 13   | 7    | 11  | 6    | 4    |
| Pkb16   | 7    | 18   | 21   | 15  | 10   | 17   | 14   | 16   | 16   | 13   | 21   | 13   | 17  | 20   | 13   |
| Elu76   | 5    | 8    | 13   | 7   | 8    | 11   | 5    | 9    | 9    | 5    | 10   | 9    | 9   | 6    | 3    |
| EL27    | 3    | 8    | 7    | 5   | 6    | 5    | 5    | 7    | 6    | 6    | 6    | 4    | 6   | 5    | 3    |
| EmaD12a | 5    | 16   | 18   | 16  | 12   | 22   | 10   | 21   | 14   | 17   | 15   | 12   | 16  | 17   | 11   |
| EL01    | 2    | 9    | 9    | 7   | 8    | 11   | 4    | 12   | 7    | 10   | 11   | 5    | 8   | 6    | 4    |
| EluB108 | 5    | 7    | 10   | 5   | 6    | 7    | 6    | 5    | 5    | 4    | 6    | 6    | 6   | 4    | 4    |
| EluBe   | 3    | 3    | 5    | 3   | 3    | 4    | 3    | 3    | 3    | 4    | 4    | 3    | 3   | 5    | 4    |
| B24     | 6    | 12   | 13   | 10  | 6    | 14   | 8    | 12   | 11   | 10   | 11   | 11   | 11  | 19   | 11   |
| Eluc033 | 5    | 7    | 10   | 9   | 8    | 9    | 3    | 9    | 3    | 7    | 7    | 7    | 9   | 8    | 4    |

| loci    | BOS4 | BOS5 | MAI7 | RHE2 | GPS | HAH | KDO | MAZ | OST | SUS | WIS | GRA | UCK4 | EDS | STM |
|---------|------|------|------|------|-----|-----|-----|-----|-----|-----|-----|-----|------|-----|-----|
| Elu87   | 4    | 6    | 8    | 3    | 3   | 6   | 3   | 4   | 5   | 4   | 6   | 4   | 5    | 5   | 5   |
| Eluc045 | 5    | 7    | 11   | 3    | 8   | 7   | 4   | 14  | 11  | 3   | 6   | 5   | 8    | 8   | 6   |
| B451    | 4    | 9    | 18   | 4    | 19  | 19  | 11  | 25  | 8   | 8   | 15  | 15  | 14   | 8   | 11  |
| PkB47   | 2    | 5    | 7    | 3    | 4   | 6   | 2   | 11  | 4   | 2   | 6   | 2   | 6    | 10  | 10  |
| Elu19   | 3    | 3    | 6    | 3    | 3   | 7   | 3   | 5   | 5   | 1   | 4   | 4   | 4    | 4   | 3   |
| EI02    | 3    | 6    | 13   | 6    | 8   | 7   | 11  | 14  | 6   | 7   | 7   | 13  | 12   | 6   | 10  |
| Pkb16   | 11   | 14   | 21   | 11   | 16  | 15  | 12  | 16  | 15  | 8   | 15  | 17  | 12   | 19  | 20  |
| Elu76   | 2    | 5    | 9    | 6    | 7   | 9   | 8   | 12  | 10  | 3   | 8   | 8   | 7    | 11  | 9   |
| EL27    | 3    | 5    | 7    | 4    | 7   | 9   | 6   | 7   | 6   | 5   | 4   | 7   | 7    | 6   | 7   |
| EmaD12a | 11   | 10   | 15   | 7    | 16  | 19  | 16  | 17  | 16  | 7   | 14  | 12  | 12   | 16  | 16  |
| EL01    | 4    | 6    | 7    | 3    | 8   | 8   | 4   | 11  | 8   | 1   | 8   | 8   | 7    | 7   | 7   |
| EluB108 | 2    | 5    | 6    | 5    | 5   | 5   | 4   | 8   | 5   | 3   | 5   | 6   | 4    | 6   | 7   |
| EluBe   | 5    | 3    | 5    | 3    | 3   | 4   | 3   | 4   | 3   | 2   | 2   | 4   | 5    | 5   | 3   |
| B24     | 12   | 16   | 16   | 11   | 14  | 11  | 10  | 13  | 14  | 8   | 12  | 12  | 9    | 12  | 13  |
| Eluc033 | 2    | 5    | 13   | 2    | 6   | 4   | 6   | 9   | 8   | 3   | 6   | 8   | 6    | 6   | 9   |

Population IDs are explained in Table 1 of the main document.

**B**

| loci    | BAR | AWU | AMS | AMP | CHS | DON | ILZ | INN | KOS | NAB | ROT | STS | WAS | WLS | EID |
|---------|-----|-----|-----|-----|-----|-----|-----|-----|-----|-----|-----|-----|-----|-----|-----|
| Elu87   | 0   | 0   | 0   | 0   | 0   | 0   | 0   | 0   | 0   | 0   | 0   | 0   | 0   | 0   | 0   |
| Eluc045 | 0   | 0   | 0   | 0   | 0   | 0   | 0   | 0   | 0   | 0   | 0   | 0   | 0   | 0   | 0   |
| B451    | 0   | 0   | 0   | 0   | 0   | 0   | 0   | 0   | 0   | 0   | 0   | 0   | 0   | 0   | 0   |
| Pkb47   | 0   | 0   | 0   | 0   | 0   | 0   | 0   | 0   | 0   | 0   | 0   | 0   | 0   | 0   | 0   |
| Elu19   | 0   | 0   | 0   | 0   | 0   | 1   | 0   | 0   | 0   | 0   | 0   | 0   | 0   | 0   | 0   |
| EL02    | 0   | 1   | 0   | 0   | 0   | 0   | 0   | 0   | 0   | 0   | 0   | 0   | 0   | 0   | 0   |
| Pkb16   | 0   | 0   | 0   | 0   | 0   | 0   | 0   | 0   | 0   | 0   | 1   | 0   | 0   | 0   | 0   |
| Elu76   | 0   | 0   | 0   | 0   | 0   | 0   | 0   | 0   | 0   | 0   | 0   | 0   | 0   | 0   | 1   |
| EL27    | 0   | 0   | 0   | 0   | 0   | 0   | 0   | 0   | 0   | 0   | 0   | 0   | 0   | 0   | 0   |
| EmaD12a | 0   | 0   | 0   | 0   | 0   | 0   | 0   | 0   | 0   | 0   | 0   | 0   | 1   | 0   | 0   |
| EL01    | 0   | 0   | 0   | 0   | 0   | 0   | 0   | 0   | 0   | 0   | 0   | 0   | 0   | 0   | 0   |
| EluB108 | 0   | 0   | 0   | 0   | 0   | 0   | 0   | 0   | 0   | 0   | 0   | 0   | 0   | 0   | 0   |
| EluBe   | 0   | 0   | 0   | 0   | 0   | 0   | 0   | 0   | 0   | 0   | 0   | 0   | 0   | 0   | 0   |
| B24     | 0   | 0   | 0   | 1   | 0   | 0   | 0   | 0   | 0   | 0   | 0   | 0   | 0   | 0   | 0   |
| Eluc033 | 0   | 0   | 0   | 0   | 0   | 0   | 0   | 0   | 0   | 0   | 0   | 0   | 0   | 0   | 0   |

| loci    | DRS | ELB6 | ELB7 | GKB | GST | HAV | JAG | KAR | KRK | MUR | STP | EMS2 | EMS3 | NEI1 | NEI2 |
|---------|-----|------|------|-----|-----|-----|-----|-----|-----|-----|-----|------|------|------|------|
| Elu87   | 0   | 0    | 0    | 0   | 0   | np  | 0   | 0   | 0   | 0   | 0   | 0    | 0    | 0    | 0    |
| Eluc045 | 0   | 0    | 0    | 0   | 0   | np  | 0   | 0   | 0   | 0   | 0   | 0    | 0    | 0    | 0    |
| B451    | 0   | 0    | 1    | 0   | 0   | np  | 0   | 0   | 0   | 0   | 1   | 2    | 0    | 0    | 0    |
| Pkb47   | 0   | 0    | 0    | 0   | 0   | np  | 0   | 0   | 0   | 0   | 0   | 0    | 0    | 0    | 0    |
| Elu19   | 0   | 0    | 1    | 0   | 0   | np  | 0   | 0   | 0   | 0   | 0   | 0    | 0    | 0    | 0    |
| EL02    | 0   | 0    | 0    | 5   | 0   | np  | 0   | 0   | 2   | 0   | 0   | 0    | 0    | 0    | 0    |
| Pkb16   | 2   | 0    | 2    | 0   | 0   | np  | 0   | 0   | 1   | 0   | 0   | 0    | 0    | 0    | 0    |
| Elu76   | 1   | 0    | 0    | 1   | 0   | np  | 0   | 0   | 0   | 0   | 0   | 0    | 0    | 0    | 0    |
| EL27    | 0   | 0    | 0    | 0   | 0   | np  | 0   | 2   | 0   | 0   | 0   | 0    | 0    | 0    | 0    |
| EmaD12a | 0   | 0    | 0    | 0   | 0   | np  | 0   | 0   | 0   | 0   | 0   | 0    | 0    | 0    | 0    |
| EL01    | 0   | 0    | 0    | 0   | 0   | np  | 0   | 0   | 0   | 0   | 0   | 1    | 0    | 0    | 0    |
| EluB108 | 0   | 1    | 0    | 0   | 0   | np  | 0   | 0   | 0   | 0   | 0   | 0    | 0    | 0    | 0    |
| EluBe   | 0   | 0    | 0    | 0   | 0   | np  | 0   | 0   | 0   | 0   | 0   | 0    | 0    | 0    | 0    |
| B24     | 0   | 0    | 0    | 0   | 0   | np  | 0   | 0   | 0   | 0   | 0   | 0    | 0    | 0    | 0    |
| Eluc033 | 0   | 0    | 0    | 0   | 0   | np  | 0   | 0   | 0   | 0   | 0   | 0    | 0    | 0    | 0    |

| loci    | NEI4 | ODE2 | ODE7 | WBS | BAS1 | BAS2 | BAS4 | BAL2 | BAL3 | BAS5 | BAL4 | BAS6 | PEE | BOS1 | BOS3 |
|---------|------|------|------|-----|------|------|------|------|------|------|------|------|-----|------|------|
| Elu87   | np   | np   | 0    | 0   | 0    | 0    | 0    | 0    | 0    | 0    | 0    | 0    | 0   | 0    | 0    |
| Eluc045 | np   | np   | 0    | 0   | 0    | 0    | 0    | 0    | 0    | 0    | 0    | 0    | 0   | 0    | 0    |
| B451    | np   | np   | 0    | 0   | 0    | 0    | 2    | 0    | 1    | 0    | 0    | 0    | 0   | 0    | 0    |
| Pkb47   | np   | np   | 2    | 0   | 0    | 2    | 0    | 2    | 0    | 0    | 0    | 0    | 0   | 0    | 0    |
| Elu19   | np   | np   | 0    | 0   | 0    | 0    | 0    | 0    | 0    | 0    | 0    | 0    | 0   | 0    | 0    |
| EL02    | np   | np   | 1    | 0   | 1    | 2    | 2    | 0    | 5    | 3    | 2    | 1    | 0   | 2    | 0    |
| Pkb16   | np   | np   | 0    | 4   | 0    | 0    | 0    | 0    | 0    | 0    | 2    | 0    | 0   | 0    | 0    |
| Elu76   | np   | np   | 0    | 1   | 0    | 0    | 0    | 0    | 1    | 1    | 0    | 0    | 2   | 0    | 0    |
| EL27    | np   | np   | 0    | 0   | 0    | 0    | 0    | 0    | 0    | 0    | 0    | 0    | 0   | 0    | 0    |
| EmaD12a | np   | np   | 0    | 0   | 0    | 0    | 0    | 0    | 0    | 0    | 2    | 0    | 0   | 0    | 0    |
| EL01    | np   | np   | 0    | 0   | 0    | 0    | 0    | 0    | 0    | 0    | 0    | 0    | 0   | 0    | 0    |
| EluB108 | np   | np   | 0    | 0   | 0    | 0    | 0    | 0    | 0    | 0    | 0    | 0    | 0   | 0    | 0    |
| EluBe   | np   | np   | 0    | 0   | 0    | 0    | 0    | 0    | 0    | 0    | 0    | 0    | 0   | 0    | 0    |
| B24     | np   | np   | 0    | 0   | 0    | 0    | 0    | 0    | 0    | 0    | 2    | 0    | 0   | 0    | 0    |
| Eluc033 | np   | np   | 0    | 0   | 0    | 0    | 0    | 0    | 0    | 0    | 0    | 0    | 0   | 0    | 0    |

| loci    | BOS4 | BOS5 | MAI7 | RHE2 | GPS | HAH | KDO | MAZ | OST | SUS | WIS | GRA | UCK4 | EDS | STM |
|---------|------|------|------|------|-----|-----|-----|-----|-----|-----|-----|-----|------|-----|-----|
| Elu87   | 0    | 0    | 1    | 0    | 1   | 0   | 0   | 0   | 0   | 0   | 0   | 0   | 0    | 0   | 0   |
| Eluc045 | 0    | 0    | 0    | 0    | 0   | 0   | 0   | 0   | 0   | 0   | 0   | 0   | 0    | 0   | 0   |
| B451    | 1    | 0    | 2    | 0    | 0   | 0   | 0   | 0   | 5   | 0   | 0   | 1   | 0    | 1   | 1   |
| Pkb47   | 0    | 0    | 0    | 0    | 0   | 0   | 0   | 0   | 0   | 0   | 0   | 0   | 0    | 0   | 0   |
| Elu19   | 0    | 0    | 0    | 0    | 0   | 1   | 0   | 0   | 0   | 0   | 0   | 0   | 0    | 0   | 0   |
| EL02    | 0    | 0    | 0    | 0    | 0   | 0   | 3   | 5   | 0   | 0   | 1   | 2   | 1    | 0   | 0   |
| Pkb16   | 0    | 0    | 0    | 0    | 0   | 3   | 0   | 1   | 2   | 0   | 0   | 0   | 2    | 0   | 0   |
| Elu76   | 0    | 0    | 0    | 2    | 1   | 0   | 2   | 0   | 0   | 0   | 0   | 0   | 0    | 0   | 0   |
| EL27    | 0    | 0    | 0    | 0    | 0   | 0   | 0   | 0   | 0   | 0   | 0   | 0   | 0    | 0   | 0   |
| EmaD12a | 0    | 0    | 0    | 0    | 0   | 0   | 0   | 0   | 0   | 0   | 0   | 0   | 0    | 0   | 0   |
| EL01    | 0    | 0    | 0    | 0    | 0   | 0   | 0   | 0   | 0   | 0   | 0   | 0   | 0    | 0   | 0   |
| EluB108 | 0    | 0    | 0    | 0    | 0   | 0   | 0   | 0   | 0   | 0   | 0   | 0   | 0    | 0   | 0   |
| EluBe   | 0    | 0    | 0    | 0    | 0   | 0   | 0   | 0   | 0   | 0   | 0   | 0   | 0    | 0   | 0   |
| B24     | 0    | 0    | 0    | 0    | 0   | 0   | 0   | 0   | 0   | 0   | 0   | 0   | 0    | 0   | 0   |
| Eluc033 | 0    | 0    | 0    | 0    | 0   | 0   | 0   | 0   | 0   | 0   | 0   | 1   | 0    | 0   | 0   |

Population IDs are explained in Table 1 of the main document.  
 np = analysis not possible
